1 **The transfer of a mitochondrial selfish element to the nuclear**  
2 **genome and its consequences**

3

4 Julien Y. Dutheil<sup>1,2,3,\*</sup>, Karin Münch<sup>2</sup>, Klaas Schotanus<sup>2,4</sup>, Eva H. Stukenbrock<sup>1,2,4</sup>, Regine Kahmann<sup>2</sup>

1. Max Planck Institute for Evolutionary Biology  
August-Thienemann-Str. 2  
24306 Plön, Germany

2. Max Planck Institute for Terrestrial Microbiology  
Karl-von-Frisch-Str. 10  
35043 Marburg, Germany

3. Institute of Evolutionary Sciences  
CNRS - University of Montpellier – IRD - EPHE  
Place Eugène Bataillon, 34095 Montpellier, France.

4. Christian Albrechts University of Kiel  
24118 Kiel, Germany

5

6 **Correspondence:**

7 \* Julien Y. Dutheil, [dutheil@evolbio.mpg.de](mailto:dutheil@evolbio.mpg.de)

8

9 **Running head:** Recent transfer of a mitochondrial homing endonuclease

10

11 **Keywords:** homing endonuclease, mitochondrion, intron, gene birth, gene transfer

12

13

## 14 **Abstract**

15 Homing endonucleases (HE) are enzymes capable of excising their encoding gene and  
16 inserting it in a highly specific target sequence. As such, they act both as intronic sequences (type-I  
17 introns) and selfish invasive elements. HEs are present in all three kingdoms of life and viruses; in  
18 eukaryotes, they are mostly found in the genomes of mitochondria and chloroplasts, as well as  
19 nuclear ribosomal RNAs. We here report the case of a HE that integrated into a telomeric region of  
20 the fungal maize pathogen *Ustilago maydis*. We show that the gene has a mitochondrial origin, but  
21 its original copy is absent from the *U. maydis* mitochondrial genome, suggesting a subsequent loss  
22 or a horizontal transfer. The telomeric HE underwent mutations in its active site and acquired a new  
23 start codon, but we did not detect significant transcription of the newly created open reading frame.  
24 The insertion site is located in a putative RecQ helicase gene, truncating the C-terminal domain of  
25 the protein. The truncated helicase is expressed during infection of the host, together with other  
26 homologous telomeric helicases. This unusual homing event represents a singular evolutionary time  
27 point: the creation of two new genes whose fate is not yet written. The HE gene lost its homing  
28 activity and can potentially acquire a new function, while its insertion created a truncated version of  
29 an existing gene, possibly altering its original function.

## 30 **Introduction**

31           The elucidation of the mechanisms at the origin of genetic variation is a longstanding goal  
32 of molecular evolutionary biology. Mutation accumulation experiments - together with comparative  
33 analysis of sequence data - are instrumental in studying the processes shaping genetic diversity at  
34 the molecular level (Kondrashov and Kondrashov 2010; Eyre-Walker and Keightley 2007). They  
35 revealed that the spectrum of mutations ranges from single nucleotide substitutions to large scale  
36 chromosomal rearrangements, and encompasses insertions, deletions, inversions, and duplication of  
37 genetic material of variable length (Lynch et al. 2008). Mutation events may result from intrinsic  
38 factors such as replication errors and repair of DNA damage. In some cases, however, mutations can  
39 be caused or favored by extrinsic factors, such as mutagenic environmental conditions or parasitic  
40 genome entities like viruses or selfish mobile elements. Such particular sequences, able to replicate  
41 and invade the host genome, may have multiple effects including inserting long stretches of DNA  
42 that do not encode any organismic function, but also disrupting, copying and moving parts of the  
43 genome sequence. These selfish element-mediated mutations can significantly contribute to the  
44 evolution of their host: first, the invasion of these elements creates “junk” DNA that can  
45 significantly increase the genome size (Lynch 2007), and some of this material can be ultimately  
46 domesticated and acquire a new function, beneficial to the host (Kaessmann 2010; Volff 2006).  
47 Second, the genome dynamics resulting from the activity of these elements can generate novelty by  
48 gene duplication (Ohta 2000; Dutheil et al. 2016) or serve as a mechanism of parasexuality and  
49 compensate for the reduced diversity in the absence of sexual reproduction (Dong et al. 2015;  
50 Möller and Stukenbrock 2017). Finally, mechanisms that evolved to control these elements (such as  
51 repeat-induced point mutations in fungi (Gladyshev 2017)) may also incidentally affect genetic  
52 diversity (Grandaubert et al. 2014).

53           Selfish elements whose impact on genome evolution is less well documented are the

54 homing endonuclease genes (HEG), encoding a protein able to recognize a particular genomic DNA  
55 sequence and cut it (homing endonuclease, HE). The resulting double-strand break is subsequently  
56 repaired by homologous recombination using the HEG itself as a template, resulting in its insertion  
57 in the target location (Stoddard 2005). As the recognized sequence is highly specific, the insertion  
58 typically happens at a homologous position. In this process, a *heg*<sup>+</sup> element containing the  
59 endonuclease gene converts a *heg*<sup>-</sup> allele (devoid of HEG but harbouring the recognition sequence)  
60 to *heg*<sup>+</sup>, a mobility mechanism referred to as *homing* (Dujon et al. 1989). After the insertion, the  
61 host cell is homozygous *heg*<sup>+</sup>, and the HEG segregates at a higher frequency than the Mendelian  
62 rate (Goddard and Burt 1999). The open reading frame of the HEG is included in a sequence  
63 capable of self-splicing, either at the RNA or protein level, avoiding disruption of functionality  
64 when inserted in a protein-coding gene. This mechanism results in the so-called group-I introns or  
65 inteins, respectively (Chevalier and Stoddard 2001; Stoddard 2005). The dynamic of HEGs has  
66 been well described, and involves three stages: (i) conversion from *heg*<sup>-</sup> to *heg*<sup>+</sup> by homing activity,  
67 (ii) degeneration of the HEG leading to the loss of homing activity, but still protecting against a new  
68 insertion because the target is altered by the insertion event and (iii) loss of the HEG leading to the  
69 restoration of the *heg*<sup>-</sup> allele (Gogarten and Hilario 2006; Barzel et al. 2011). This cycle leads to  
70 recurrent gains and losses of HEG at a given genomic position, and ultimately to the loss of the  
71 HEG at the population level unless new genes invade from other locations or by horizontal gene  
72 transfer (Gogarten and Hilario 2006).

73 HEGs are found in all kingdoms of life as well as in the genomes of organelles,  
74 mitochondria and chloroplasts (Stoddard 2005; Lambowitz and Belfort 1993; Belfort and Roberts  
75 1997). In several fungi, HEGs are residents of mitochondria. Here, we study the molecular  
76 evolution of a HEG from the fungus *Ustilago maydis*, which serves as a model for the elucidation  
77 of (1) fundamental biological processes like cell polarity, morphogenesis, organellar targeting, and  
78 (2) the mechanisms allowing biotrophic fungi to colonize plants and cause disease (Steinberg and

79 Perez-Martin 2008; Djamei and Kahmann 2012; Vollmeister et al. 2012; Ast et al. 2013). *U. maydis*  
80 is the most well-studied representative of smut fungi, a large group of plant pathogens, because of  
81 the ease by which it can be manipulated both genetically and through reverse genetics approaches  
82 (Vollmeister et al. 2012). Besides, its compact, fully annotated genome comprises only 20.5 Mb and  
83 is mostly devoid of repetitive DNA (Kämper et al. 2006). The genome sequences of several related  
84 species, *Sporisorium reilianum*, *S. scitamineum* and *Ustilago hordei* causing head smut in corn,  
85 smut whip in sugarcane and covered smut in barley, respectively, provide a powerful resource for  
86 comparative studies (Schirawski et al. 2010; Laurie et al. 2012; Dutheil et al. 2016). We report here  
87 the case of a gene from *U. maydis*, which we demonstrate to be a former mitochondrial HEG  
88 recently integrated into the nuclear genome. The integration of the gene has truncated the gene  
89 containing the insertion, followed by inactivation of the endonuclease active site, which generated a  
90 new open reading frame that contains the DNA-binding domain of the HEG (Derbyshire et al.  
91 1997).

## 92 **Results**

93 We report the analysis of the nuclear gene *UMAG\_11064* from the smut fungus *U.*  
94 *maydis*, which was identified as an outlier in a whole-genome analysis of codon usage. We first  
95 provide evidence that the gene is a former HEG and then reconstruct the molecular events that led  
96 to its insertion in the nuclear genome using comparative sequence analysis. Finally, we assess the  
97 phenotypic impact of the insertion event.

### 98 **The *UMAG\_11064* nuclear gene has a mitochondrial codon usage.**

99 We studied the synonymous codon usage in protein-coding genes of the smut fungus *U.*  
100 *maydis*, using within-group correspondence analysis. As opposed to other methods, within-group  
101 correspondence analysis allows to compare codon usage while adequately taking into account  
102 confounding factors such as variation in amino-acid usage (Perrière and Thioulouse 2002). We

103 report a distinct synonymous codon usage for nuclear genes and mitochondrial genes (Figure 1A),  
104 with the notable exception of the nuclear gene *UMAG\_11064*, which displays a typical  
105 mitochondrial codon usage. The *UMAG\_11064* gene is located in the telomeric region of  
106 chromosome 9, with no further downstream annotated gene (Figure 1B). It displays a low GC  
107 content of 30%, which contrasts with the GC content of the flanking regions (50%) and the rather  
108 homogeneous composition of the genome sequence of *U. maydis* as a whole. It is, however, in the  
109 compositional range of the mitochondrial genome (Figure 1B). Altogether, the synonymous codon  
110 usage and GC content of *UMAG\_11064* suggest a mitochondrial origin.

111 In order to confirm the chromosomal location of *UMAG\_11064*, we amplified and  
112 sequenced three regions encompassing the gene using primers within the *UMAG\_11064* gene and  
113 primers in adjacent chromosomal genes upstream and downstream of *UMAG\_11064* (Figure S1).  
114 The sequences of the amplified segments were in full agreement with the genome sequence of *U.*  
115 *maydis* (Kämper et al. 2006), thereby ruling out possible assembly artefacts in this region.  
116 Surprisingly, the sequence of *UMAG\_11064* has no match in the mitochondrial genome of *U.*  
117 *maydis* (GenBank entry NC\_008368.1), which suggests that *UMAG\_11064* is an authentic nuclear  
118 gene. As both the GC content and synonymous codon usage of *UMAG\_11064* are indistinguishable  
119 from the ones of mitochondrial genes and have not moved toward the nuclear equilibrium, the  
120 transfer of the gene to its nuclear position must have occurred recently.

## 121 **The *UMAG\_11064* gene contains parts of a former GIY-YIG homing** 122 **endonuclease**

123 To gain insight into the nature of the *UMAG\_11064* gene, its predicted nucleotide  
124 sequence was searched against the NCBI non-redundant nucleotide sequence database. High  
125 similarity matches were found in the mitochondrial genome of three other smut fungi  
126 (Supplementary Table S1): *S. reilianum* (87% identity), *S. scitamineum* (79%), and *U. bromivora*

127 (76%). Two other very similar sequences were found in the mitochondrial genome of two other  
128 smut fungi, *Tilletia indica* and *Tilletia walkeri*, as well as in mitochondrial genomes from other  
129 basidiomycetes (e.g. *Laccaria bicolor*) and ascomycetes (e.g. *Leptosphaeria maculans*, see  
130 Supplementary Table S1). The protein sequence of *UMAG\_11064* shows high similarity with fungal  
131 HEGs, in particular of the so-called GIY-YIG family (Supplementary Table S2) (Stoddard 2005).  
132 The closest fully annotated protein sequence matching *UMAG\_11064* corresponds to the GIY-YIG  
133 HEG located in intron 1 of the *cox1* gene of *Agaricus bisporus* (I-AbiIII-P). The amino-acid  
134 sequence of *UMAG\_11064* matches the N-terminal part of this protein containing the DNA-binding  
135 domain of the HE (Derbyshire et al. 1997). As the GC profile of *UMAG\_11064* suggests that the  
136 upstream region also has a mitochondrial origin (Figure 1B), we performed a codon alignment of  
137 the 5' region with the full intron sequence of *A. bisporus*, *T. indica* and *T. walkeri* as well as the  
138 sequence of I-AbiIII-P in order to search for putative traces of the activity domain of the HE (Figure  
139 2). We used the Macse software (Ranwez et al. 2011) to infer codon alignment in the presence of  
140 frameshifts. We found that the intergenic region between *UMAG\_11065* and *UMAG\_11064* displays  
141 homology to the activity domain of other GIY-YIG HE, and contains remnants of the former active  
142 site of the type GVV-YIG (Figure 2). Compared to I-AbiIII-P and homologous sequences in *Tilletia*,  
143 however, a frameshift mutation has occurred in the active site (a 7 bp deletion). The predicted gene  
144 model for *UMAG\_11064*, therefore, starts at a conserved methionine position, 14 amino-acids  
145 downstream of the former active site (Figure 2). Altogether, these results suggest that  
146 *UMAG\_11064* is a former HE which inserted into the nuclear genome, was then inactivated by a  
147 deletion in its active site and acquired a new start codon.

## 148 **The *UMAG\_11064* gene is similar to an intronic mitochondrial sequence**

### 149 **of *S. reilianum***

150 The closest homologous sequence of *UMAG\_11064* was found in the first intron of the

151 *coxI* gene of the smut fungus *S. reilianum* while this sequence was absent in the mitochondrial  
152 genome of *U. maydis*. The *coxI* genes of *S. reilianum* and *U. maydis* both have eight introns, of  
153 which only seven are homologous in position and sequence (Figure 3). *S. reilianum* has one extra  
154 intron in position 1, while *U. maydis* has one extra intron in position 6. In *U. maydis* all introns but  
155 the sixth one are reported to be of type I, *i.e.* contain a HEG which is responsible for their correct  
156 excision. A blast search of this intron's sequence, however, revealed similarity with a homing  
157 endonuclease of type LAGLIDADG (Supplementary Table S4). In *S. reilianum*, intron 1 (the  
158 putative precursor of *UMAG\_11064*) and intron 2 are not annotated as containing a HEG. Blast  
159 searches of the corresponding sequences, however, provided evidence for homology with a GIY-  
160 YIG HE (Supplementary Table S5) and a LAGLIDADG HE, respectively (Supplementary Table  
161 S6).

162 Furthermore, intron 1 in *S. reilianum* was not detected in *U. maydis*. A closer inspection  
163 showed that the ORF could be aligned with related HEGs (Figure 2). This alignment revealed an  
164 insertion of four amino-acids, a deletion of the first glycine residue in the active site plus several  
165 frameshifts at the beginning of the gene, which suggests that this gene has been altered and might  
166 not encode a functional HE any longer.

### 167 ***UMAG\_11064* inserted into a gene encoding a RecQ helicase**

168 In order to study the effect of the HEG insertion in the nuclear genome, we looked at the  
169 genomic environment of the *UMAG\_11064* gene. Downstream of *UMAG\_11064* are telomeric  
170 repeats, while the next upstream gene, *UMAG\_11065*, is uncharacterized. A similarity search for  
171 *UMAG\_11065* detected 13 homologous sequences in the *U. maydis* genome (including one,  
172 *UMAG\_12076*, on an unmapped contig), but only low-similarity matches in other sequenced smut  
173 fungi (see Methods). The closest non-smut related sequence comes from a gene from *Fusarium*  
174 *oxysporum*. We inferred the evolutionary relationships between the 14 genes by reconstructing a  
175 maximum likelihood phylogenetic tree, and found that the *UMAG\_11065* gene is closely related to



176 *UMAG\_04486*, located on chromosome 14 (Figure 4 and Table 1). The *UMAG\_04486* gene,  
177 however, is predicted to be almost six times as long as *UMAG\_11065*, suggesting that the latter was  
178 truncated because of the *UMAG\_11064* insertion. A search for similar sequences of *UMAG\_11065*  
179 and its relatives in public databases revealed homology with so-called RecQ helicases  
180 (Supplementary Table S3), enzymes known to be involved in DNA repair and telomere expansion  
181 (Singh et al. 2012). While this function is only predicted by homology, we note that all 12  
182 chromosomal *recQ* related genes are located very close to telomeres in *U. maydis* (Table 1),  
183 suggesting a role of these gene in telomere maintenance (Sánchez-Alonso and Guzmán 1998).  
184 Interestingly, this gene family also contains the gene *UMAG\_03394*, which is located four genes  
185 upstream of *UMAG\_11065*. Chromosome 9 appears to be the only chromosome with two helicase  
186 genes on the same chromosome end (Table 1).

## 187 ***U. maydis* populations shows structural polymorphism in the telomeric** 188 **region of chromosome 9**

189 Because the *UMAG\_11064* gene still displays a strong signature of its mitochondrial  
190 origin (codon usage and GC content), its transfer most likely occurred recently. In order to provide a  
191 timeframe for the insertion event, we examined the structure of the genomic region of the insertion  
192 in other *U. maydis* and *S. reilianum* isolates, as well as the structure of the *cox1* exons 1, 2 and 7.  
193 The regions that could be amplified and their corresponding sizes are listed in Table 2. The  
194 *UMAG\_11064* gene is present in the FB1-derived strain SG200, as well as the Holliday strains 518  
195 and 521, but is absent in nuclear as well mitochondrial genome sequences of a recent *U. maydis*  
196 isolate from the US, strain 10-1, as well as from 5 Mexican isolates (I2, O2, P2, S5 and T6, Figure  
197 S2A). The *UMAG\_11072* gene, however, which is located further away from the telomere on the  
198 same chromosome arm, could be amplified in all strains (Figure S2B). All *U. maydis* strains possess  
199 intron 6 in the mitochondrial *cox1* gene, which is absent in *S. reilianum*, while the three *S.*

200 *reilianum* strains tested carry intron 1, that is absent in all *U. maydis* strains (Figure S2C-D). These  
201 results suggest that the *UMAG\_11064* gene inserted in an ancestor of the two strains 518 and 521,  
202 after the divergence from other *U. maydis* strains, an event that occurred very recently. Moreover,  
203 the most direct descendant of the progenitor of the HEs, *i.e.* intron 1 in the *cox1* gene, could not be  
204 found in any of the sequenced mitochondrial genomes of *U. maydis* strains, while it is present in the  
205 three sequenced *S. reilianum* strains (Figure S2).

## 206 **Functional characterization**

207 To shed light on the functional implication of the translocation of the HEG and  
208 subsequent mutations we (i) assessed the expression profile of these genes and (ii) generated a  
209 deletion strain and phenotyped it. For the expression analysis we relied on a previously published  
210 RNASeq data set (Lanver et al. 2018), from which we extracted the expression profiles of genes in  
211 the telomeric region of chromosome 9 (Figure 5A). While the expression of *UMAG\_11064*  
212 remained close to zero in the three replicates, expression of *UMAG\_11065* increased during plant  
213 infection. The telomeric region was highly heterogeneous in terms of expression profile: while  
214 *UMAG\_11066* and *UMAG\_03393* did not show any significant level of expression, *UMAG\_03392*  
215 was down-regulated starting at twelve hours post-infection, while *UMAG\_03394*, another RecQ-  
216 encoding gene homologous to *UMAG\_11065*, displayed constitutively high levels of expression  
217 (Figure 5A). All homologs of *UMAG\_11065* show a significantly higher expression during infection  
218 (Tukey's posthoc test, false discovery rate of 5%, Figure 5B). The comparison of expression  
219 profiles revealed two main classes of genes (Figure 5C): highly expressed genes (upper group), and  
220 moderately expressed genes (lower group), to which *UMAG\_11065* belongs. We further note that  
221 the differences in expression profiles do not mirror the protein sequence similarity of the genes  
222 (Mantel permutation test, p-value = 0.566).

223 To assess the function *UMAG\_11064* and *UMAG\_11065* were simultaneously deleted in  
224 SG200, a solopathogenic haploid strain that can cause disease without a mating partner (Kämper et

225 al. 2006) using a single-step gene replacement method (Kämper 2004). Gene deletion was verified  
226 by Southern analysis (Figure S3). Virulence assays, conducted in triplicate revealed no statistically  
227 different symptoms of SG200Δ11065Δ11064 compared to SG200 in infected maize plants (Figure  
228 6A, Chi-square test, p-value = 0.453). Since RecQ helicases contribute to dealing with replication  
229 stress (Kojic and Holloman 2012) we also determined the sensitivity of the mutant to various  
230 stressors including UV, hydroxyurea and Congo Red. (Figure 6B). We report that the deletion strain  
231 shows increased sensitivity to cell wall stress induced by Congo Red and increased resistance to UV  
232 stress. Since *UMAG\_11064* does not show any detectable level of expression, we hypothesize that  
233 the deletion of *UMAG\_11065* is responsible for this phenotype.

## 234 **Discussion**

235         The codon usage and GC content of the *UMAG\_11064* gene, as well as its similarity to  
236 known mitochondrial HEGs, points at a recent transfer into the nuclear genome of *U. maydis*.  
237 Moreover, the precursor of this gene is absent from the mitochondrial genome of this species. To  
238 explain this pattern, we propose a scenario involving a transfer of the gene to the nuclear genome  
239 followed by a loss of the mitochondrial copy (Figure 7). We hypothesize that the mitochondrial  
240 HEG was present in the *U. maydis* ancestor. The evolutionary scenario involves two events: the  
241 insertion of the HEG into the nuclear genome, on the one hand, creating a HEG<sup>+</sup> genotype at the  
242 nuclear locus (designated [HEG<sup>+</sup>]<sub>nuc</sub>), and the loss of the mitochondrial copy, creating a HEG<sup>-</sup>  
243 genotype at the mitochondrial locus (designated [HEG<sup>-</sup>]<sub>mit</sub>). These two events might have happened  
244 independently, but the former cannot have happened after the fixation of the [HEG<sup>-</sup>]<sub>mit</sub> genotype in  
245 the population. The [HEG<sup>+</sup>]<sub>nuc</sub> / [HEG<sup>-</sup>]<sub>mit</sub> genotype could be generated by a cross between two  
246 individuals, one [HEG<sup>+</sup>]<sub>nuc</sub> and the other [HEG<sup>-</sup>]<sub>mit</sub>, given that mitochondria are uniparentally  
247 inherited in *U. maydis* (Basse 2010). The segregation of the [HEG<sup>+</sup>]<sub>nuc</sub> and [HEG<sup>-</sup>]<sub>mit</sub> variants could  
248 be either neutral, and therefore driven by genetic drift, or enhanced by selection if such variants  
249 conferred an advantage to their carrier. An intriguing alternative scenario is that the mitochondrial

250 HEG was not ancestral to *U. maydis*, but was horizontally transferred from *S. reilianum* (or a related  
251 species). In support of this hypothesis is the high similarity of the *UMAG\_11064* gene to the *S.*  
252 *reilianum* mitochondrial HEG (Figure 2), which contrasts with the relatively high nucleotide  
253 divergence between the two species, which diverged around 20 My ago (Schweizer et al. 2018).  
254 Besides, it is worth noting that *U. maydis* and *S. reilianum* share the same host, and that  
255 hybridization between smut species has been reported (Fischer 1957; Boidin 1986).

256 HEGs are found in eukaryotic nuclei but are usually restricted to small and large  
257 ribosomal RNA subunit genes (Lambowitz and Belfort 1993; Dunin-Horkawicz et al. 2006). While  
258 transfer of DNA segments and functional genes from organellar genomes to the nucleus is well  
259 documented (Sun and Callis 1993; Thorsness and Weber 1996; Lloyd and Timmis 2011; Fuentes et  
260 al. 2012), established examples of HEG insertions at other genomic locations than rRNA genes is  
261 very scarce. Louis and Haber (Louis and Haber 1991) reported such a transfer into a telomeric  
262 region of *Saccharomyces cerevisiae*. The authors argue that signatures of such insertion could be  
263 found because (1) it had no deleterious effect and (2) the occurrence of heterologous recombination  
264 between telomeres favours the maintenance of elements, which would otherwise be lost.  
265 Contrasting with this result, the insertion of the GIY-YIG HEG that inserted into the ancestor of the  
266 *UMAG\_11065* gene potentially had non-neutral effects, resulting in an expressed truncated protein.  
267 The sequence of *UMAG\_11064* suggests a recent transfer into the nuclear genome, but finding  
268 several mutations within the active site, the encoded protein is unlikely to be functional. As no  
269 significant level of expression was measured for this gene, this newly acquired gene is most likely  
270 undergoing pseudogenisation. However, as this mitochondrial HEG inserted into a nuclear *U.*  
271 *maydis* gene, it might have had phenotypic consequences not directly due to the HEG gene itself.  
272 The *UMAG\_11065* gene appeared to have been truncated by the HEG insertion, which removed the  
273 C-terminal part of the encoded protein, and the truncated *UMAG\_11065* is expressed during  
274 infection. While we were unable to detect a contribution to virulence, our results point at a putative

275 role of the truncated RecQ helicase into stress tolerance, as it increases both resistance to UV  
276 radiation and susceptibility to cell wall stress. We hypothesise that the first effect is possibly due to  
277 the truncated UMAG\_11065 protein interfering with telomere maintenance, making the cell more  
278 susceptible to UV damage. How the truncated UMAG\_11065 RecQ helicase could improve coping  
279 with cell wall stress, however, remains to be investigated, as well as the potential fitness benefit or  
280 cost of these phenotypes.

## 281 **Conclusions**

282 In this study, we report instances of two stages of the life cycle of HEGs. Intron 1 of the  
283 mitochondrial *cox1* gene of *S. reilianum* was shown to contain a degenerated GIY-YIG HEG, while  
284 the homologous position in the *U. maydis* gene displays no intron. Besides, in the telomeric region  
285 of chromosome 9 of the nuclear genome of *U. maydis*, we found evidence of a recent migration of a  
286 very similar GIY-YIG HEG. This very rare event could be uncovered thanks to its recent occurrence  
287 and the singularly homogeneous composition of the *U. maydis* nuclear genome. It likely represents  
288 a snapshot of evolution, when a mutational event occurred, but selection did not have time yet to  
289 act. The future of this insertion remains, therefore, to be written. Its absence in any field isolates of  
290 *U. maydis* sequenced so far suggests that either the mutation was lost in natural populations, or that  
291 it occurred in the lab after the selection of the original Holliday strains. These results demonstrate  
292 that HEGs, like other mobile elements, may represent a so far understudied source of genetic  
293 diversity.

## 294 **Material and Methods**

### 295 **Analysis of codon usage and GC content**

296 *Ustilago maydis* gene models (genome version 2.0) were retrieved from the MIPS

297 database (Mewes et al. 2011). Mitochondrial genes were extracted from the *U. maydis* full  
298 mitochondrial genome (Genbank accession number: NC\_008368.1). Within-group correspondence  
299 analysis of synonymous codon usage was performed using the *ade4* package for R, following the  
300 procedure described in (Charif et al. 2005). The proportion of G and C nucleotides was computed  
301 along with the first 10 kb of *U. maydis* chromosome 9, using 300 bp windows slid by 1 bp. The  
302 corresponding R code is available as Supplementary File S1.

### 303 **Strains, growth conditions and virulence assays**

304         The *Escherichia coli* strains DH5 $\alpha$  (Bethesda Research Laboratories) and TOP10 (Life  
305 Technologies, Carlsbad, CA, USA) were used for the cloning and amplification of plasmids. *U.*  
306 *maydis* strains 518 and 521 are the parents of FB1 and FB2 (Banuett and Herskowitz 1989). SG200  
307 is a haploid solopathogenic strain derived from FB1 (Kämper et al. 2006). 10-1 is an uncharacterized  
308 haploid *U. maydis* strain isolated in the US and kindly provided by G. May. I2, O2, P2, S5, and T6  
309 are haploid *U. maydis* strains collected in different parts of Mexico (Valverde et al. 2000). The  
310 haploid *S. reilianum* strains SRZ1 and SRZ2 as well as the solopathogenic strain JS161 derived  
311 from SRZ1 have been described (Schirawski et al. 2010). Deletion mutants were generated by gene  
312 replacement using a PCR-based approach and verified by Southern analysis (Kämper 2004).

313         pRS426 $\Delta$ um11064+11065 is a pRS426-derived plasmid containing the *UMAG\_11064/*  
314 *UMAG\_11065* double deletion construct which consists of a hygromycin resistance cassette flanked  
315 by the left border of the *UMAG\_11064* and right border of the *UMAG\_11065* gene. The left border  
316 of *UMAG\_11064* and the right border of *UMAG\_11065* were PCR amplified from SG200 gDNA  
317 with primers um11064\_lb\_fw/um11064\_lb\_rv and um11065\_rb\_fw/um11065\_rb\_rv  
318 (Supplementary Table S7). The hygromycin resistance cassette was obtained from SfiI digested  
319 pHwtFRT (Khrunyk et al. 2010). The pRS426 EcoRI/XhoI backbone, both borders and the  
320 resistance cassette were assembled using yeast drag and drop cloning (Christianson et al. 1992). The  
321 fragment containing the deletion cassette was amplified from this plasmid using primers

322 um11064\_lb\_fw and um11065\_rb\_rv, transformed into SG200 and transformants carrying a  
323 deletion of *UMAG\_11064* and *UMAG\_11065* were identified by southern analysis (Figure S3).

324 *U. maydis* strains were grown at 28°C in liquid YEPSL medium (0.4% yeast extract, 0.4%  
325 peptone, 2% sucrose) or on PD solid medium (2.4% Potato Dextrose broth, 2% agar). Stress assays  
326 were performed as described in (Krombach et al. 2018). Transformation and selection of *U. maydis*  
327 transformants followed published procedures (Kämper et al. 2006). To assess virulence, seven day  
328 old maize seedlings of the maize variety Early Golden Bantam (Urban Farmer, Westfield, Indiana,  
329 USA) were syringe-infected. At least three independent infections were carried out and disease  
330 symptoms were scored according to Kämper et al. (Kämper et al. 2006). Consistence of replicates  
331 was tested using a chi-squared test and p-values were computed using 1,000,000 permutations. As  
332 no significant difference between replicates was observed (p-value = 0.347 for the wildtype and p-  
333 value = 0.829 for the deletion strain), observation were pooled between all replicates for each strain  
334 before being compared.

### 335 **Blast searches and gene alignment**

336 We performed BlastN and BlastP (Altschul et al. 1990) searches using the (translated)  
337 sequence of *UMAG\_11064* as a query using NCBI online blast tools. The non-redundant nucleotide  
338 and protein sequence databases were selected for BlastN and BlastP, respectively. Results were  
339 further processed with scripts using the NCBIXML module from BioPython modules (Cock et al.  
340 2009). The Macse codon aligner (Ranwez et al. 2011) was used in order to infer the position of  
341 putative frameshifts in the upstream region of *UMAG\_11064*. The alignment was depicted using the  
342 Boxshade software and was further manually annotated. The sequences of *U. maydis cox1* intron 6,  
343 as well as *S. reilianum cox1* introns 1 and 2 were used as query and searched against the protein non  
344 redundant database using NCBI BlastX, excluding environmental samples and model sequences.  
345 The *cox1* genes from *U. maydis* and *S. reilianum* were aligned and pairwise similarity was  
346 computed in non-overlapping 100 bp windows (Supplementary File S1). The gene structure,



347 synteny and local pairwise similarity was depicted using the genoPlotR package for R (Guy et al.  
348 2010).

### 349 **Amplification of the *UMAG\_11064* regions in several *U. maydis* strains**

350 Amplification of DNA fragments via polymerase chain reaction (PCR) was done using  
351 the Phusion High Fidelity DNA\_Polymerase (Thermo Fisher Scientific, Waltham, USA). The PCR  
352 reactions were set up in a 20 µl reaction volume using DNA templates indicated in the respective  
353 experiments and buffer recommended by the manufacturer containing a final concentration of 3%  
354 DMSO. The PCR programs used are represented by the following scheme: Initial denaturation –  
355 [denaturation – annealing – elongation] x number cycles – final elongation. *UMAG\_11072* was  
356 amplified with primers um11072\_ORF\_fw x um11072\_ORF\_rv using 98 °C/3 m - [98 °C/10 s – 65  
357 °C/30 s - 72 °C/45 s] x 30 cycles - 72 °C/10 m. *UMAG\_11064* was amplified with primers  
358 um11064\_ORF\_fw x um11064\_ORF\_rv using 98 °C/3 m - [98 °C/10 s – 65 °C/30 s - 72 °C/45 s] x  
359 30 cycles - 72 °C/10 m. The *cox1* exons 1+2 were amplified with primers cox1\_ex1\_rv x  
360 cox1\_ex2\_fw using 98 °C/3 m - [98 °C/10 s – 63 °C/30 s - 72 °C/90 s] x 33 cycles - 72 °C/10 m.  
361 *cox1* exon 7 was amplified with primers cox1\_ex7\_fw X cox1\_ex7\_rv using 98 °C/3 m - [98 °C/10  
362 s – 67 °C/30 s - 72 °C/60 s] x 30 cycles - 72 °C/10 m. Parts of the genomic region containing  
363 *UMAG\_11064*, *UMAG\_11065* and *UMAG\_11066* were amplified with primer pairs um11064\_fw1 x  
364 um11064\_rv1, um11064\_fw1 x um11064\_rv2; and um11064\_fw2 x um11064\_rv2 using 98 °C/3 m  
365 - [98 °C/10 s – 65 °C/30 s - 72 °C/150 s] x 32 cycles - 72 °C/10 m. The list of all primer sequences  
366 is provided in Supplementary Table S7. PCR results are shown in Figures S1 and S2.

### 367 **History of the *UMAG\_11065* family**

368 The sequence of the *UMAG\_11065* protein was used as a query for a search against  
369 several smut fungi (*U. maydis*, *U. hordei*, *S. reilianum*, *S. scitamineum*, *Melanopsichum*  
370 *pennsylvanicum*, *Pseudozyma flocculosa*), complete proteome using BlastP (Altschul et al. 1990).



371 The search finds 17 hits within the *U. maydis* genome with an E-value below 0.0001, as well as two  
372 genes in *Sporisorium scitamineum* (*SPSC\_04622* and *SPSC\_05783*) and two genes in *Pseudozyma*  
373 *flocculosa* (*PFL1\_06135* and *PFL1\_02192*). Using NCBI BlastP, we found several sequences from  
374 *Fusarium oxysporum* with high similarity. We selected the sequence *FOXG\_04692* as a  
375 representative and added it to the data set. The Guidance web server with the GUIDANCE2  
376 algorithm was then used to align the protein sequences and assess the quality of the resulting  
377 alignment. Default options from the server were kept, selecting the MAFFT aligner (Katoh et al.  
378 2002). Several sequences appeared to be of shallow alignment quality and were discarded. The  
379 remaining sequences were realigned using the same protocol. Four iterations were performed until  
380 the final alignment had a quality good enough for phylogenetic inference. The final alignment  
381 contained 14 sequences and had a global score of 0.79. These 14 alignable sequences contained 13  
382 *U. maydis* sequences (including *UMAG\_11065*), and the *F. oxysporum* gene, other sequences from  
383 smut genomes were too divergent to be unambiguously aligned. Using Guidance, we further  
384 masked columns in the alignment with a score below 0.93 (a maximum of one position out of 14 in  
385 the column was allowed to be uncertain).

386 A phylogenetic analysis was conducted using the program Seaview 4 (Gouy et al. 2010).  
387 First, a site selection was performed in order to filter regions with too many gaps, leaving 506 sites.  
388 Second, a phylogenetic tree was built using PhyML within Seaview (Guindon et al. 2010) (Le and  
389 Gascuel protein substitution model (Le and Gascuel 2008) with a four-classes discretized gamma  
390 distribution of rates, the best tree of Nearest Neighbour Interchange (NNI) and Subtree Pruning and  
391 Regrafting (SPR) topological searches was kept). Support values were computed using the  
392 approximate likelihood ratio test (aLRT) method (Anisimova and Gascuel 2006). The resulting tree  
393 was rooted using the midpoint rooting method in Seaview.

## 394 **Gene expression**

395 RNASeq normalized expression counts for the *UMAG\_11064* and *UMAG\_11065*, as well

396 as of neighbouring genes and paralogs elsewhere in the genome, were extracted from the Gene  
397 Expression Omnibus data set GSE103876 (Lanver et al. 2018). Gene clustering based on expression  
398 profiles was conducted using a hierarchical clustering with an average linkage on a Canberra  
399 distance, suitable for expression counts, as implemented in the ‘dist’ and ‘hclust’ functions in R (R  
400 Core Team 2018). The resulting clustering tree was converted to a distance matrix and compared to  
401 the inferred phylogeny of the genes using a Mantel permutation test, as implemented in the ‘ape’  
402 package for R (Paradis et al. 2004). Differences in expression between time points were assessed by  
403 fitting the linear model “expression ~ time \* gene”, testing the effect of time while controlling for  
404 interaction with the “gene” variable. Residuals were normalized using a Box-Cox transform as  
405 implemented in the MASS package for R. Tukey’s posthoc comparisons were conducted on the  
406 resulting model, allowing for a 5% false discovery rate.

## 407 **Acknowledgments**

408 We thank all members of the group for stimulating discussions. We are grateful to  
409 Georgiana May and Octavio Paredes-López for providing field isolates of *U. maydis* from the US  
410 and Mexico, respectively. We acknowledge the generous support by the Max Planck Society.

## 411 **References**

- Altschul SF, Gish W, Miller W, Myers EW, Lipman DJ. 1990. Basic local alignment search tool. *J Mol Biol* **215**: 403–410.
- Anisimova M, Gascuel O. 2006. Approximate likelihood-ratio test for branches: A fast, accurate, and powerful alternative. *Syst Biol* **55**: 539–552.
- Ast J, Stiebler AC, Freitag J, Bölker M. 2013. Dual targeting of peroxisomal proteins. *Front Physiol* **4**: 297.
- Banuett F, Herskowitz I. 1989. Different alleles of *Ustilago maydis* are necessary for maintenance of filamentous growth but not for meiosis. *Proc Natl Acad Sci U S A* **86**: 5878–5882.
- Barzel A, Obolski U, Gogarten JP, Kupiec M, Hadany L. 2011. Home and away- the evolutionary dynamics of homing endonucleases. *BMC Evol Biol* **11**: 324.
- Basse CW. 2010. Mitochondrial inheritance in fungi. *Curr Opin Microbiol* **13**: 712–719.

- Belfort M, Roberts RJ. 1997. Homing endonucleases: keeping the house in order. *Nucleic Acids Res* **25**: 3379–3388.
- Boidin J. 1986. Intercompatibility and the species concept in the saprobic basidiomycotina. *Mycotaxon* **XXVI**: 319–336.
- Charif D, Thioulouse J, Lobry JR, Perrière G. 2005. Online synonymous codon usage analyses with the ade4 and seqinR packages. *Bioinforma Oxf Engl* **21**: 545–547.
- Chevalier BS, Stoddard BL. 2001. Homing endonucleases: structural and functional insight into the catalysts of intron/intein mobility. *Nucleic Acids Res* **29**: 3757–3774.
- Christianson TW, Sikorski RS, Dante M, Shero JH, Hieter P. 1992. Multifunctional yeast high-copy-number shuttle vectors. *Gene* **110**: 119–122.
- Cock PJA, Antao T, Chang JT, Chapman BA, Cox CJ, Dalke A, Friedberg I, Hamelryck T, Kauff F, Wilczynski B, et al. 2009. Biopython: freely available Python tools for computational molecular biology and bioinformatics. *Bioinforma Oxf Engl* **25**: 1422–1423.
- Derbyshire V, Kowalski JC, Dansereau JT, Hauer CR, Belfort M. 1997. Two-domain structure of the td intron-encoded endonuclease I-TevI correlates with the two-domain configuration of the homing site. *J Mol Biol* **265**: 494–506.
- Djamei A, Kahmann R. 2012. *Ustilago maydis*: dissecting the molecular interface between pathogen and plant. *PLoS Pathog* **8**: e1002955.
- Dong S, Raffaele S, Kamoun S. 2015. The two-speed genomes of filamentous pathogens: waltz with plants. *Curr Opin Genet Dev* **35**: 57–65.
- Dujon B, Belfort M, Butow RA, Jacq C, Lemieux C, Perlman PS, Vogt VM. 1989. Mobile introns: definition of terms and recommended nomenclature. *Gene* **82**: 115–118.
- Dunin-Horkawicz S, Feder M, Bujnicki JM. 2006. Phylogenomic analysis of the GIY-YIG nuclease superfamily. *BMC Genomics* **7**: 98.
- Dutheil JY, Mannhaupt G, Schweizer G, Sieber CMK, Münsterkötter M, Güldener U, Schirawski J, Kahmann R. 2016. A Tale of Genome Compartmentalization: The Evolution of Virulence Clusters in Smut Fungi. *Genome Biol Evol* **8**: 681–704.
- Eyre-Walker A, Keightley PD. 2007. The distribution of fitness effects of new mutations. *Nat Rev Genet* **8**: 610–618.
- Fischer C. 1957. *Biology and Control of Smut Fungi*. John Wiley & Sons Canada, Limited.
- Fuentes I, Karcher D, Bock R. 2012. Experimental reconstruction of the functional transfer of intron-containing plastid genes to the nucleus. *Curr Biol CB* **22**: 763–771.
- Gladyshev E. 2017. Repeat-Induced Point Mutation and Other Genome Defense Mechanisms in Fungi. *Microbiol Spectr* **5**.
- Goddard MR, Burt A. 1999. Recurrent invasion and extinction of a selfish gene. *Proc Natl Acad Sci U S A* **96**: 13880–13885.

- Gogarten JP, Hilario E. 2006. Inteins, introns, and homing endonucleases: recent revelations about the life cycle of parasitic genetic elements. *BMC Evol Biol* **6**: 94.
- Gouy M, Guindon S, Gascuel O. 2010. SeaView version 4: A multiplatform graphical user interface for sequence alignment and phylogenetic tree building. *Mol Biol Evol* **27**: 221–224.
- Grandaubert J, Lowe RGT, Soyer JL, Schoch CL, Van de Wouw AP, Fudal I, Robbertse B, Lapalu N, Links MG, Ollivier B, et al. 2014. Transposable element-assisted evolution and adaptation to host plant within the *Leptosphaeria maculans*-*Leptosphaeria biglobosa* species complex of fungal pathogens. *BMC Genomics* **15**: 891.
- Guindon S, Dufayard J-F, Lefort V, Anisimova M, Hordijk W, Gascuel O. 2010. New algorithms and methods to estimate maximum-likelihood phylogenies: assessing the performance of PhyML 3.0. *Syst Biol* **59**: 307–321.
- Guy L, Kultima JR, Andersson SGE. 2010. genoPlotR: comparative gene and genome visualization in R. *Bioinforma Oxf Engl* **26**: 2334–2335.
- Kaessmann H. 2010. Origins, evolution, and phenotypic impact of new genes. *Genome Res* **20**: 1313–1326.
- Kämper J. 2004. A PCR-based system for highly efficient generation of gene replacement mutants in *Ustilago maydis*. *Mol Genet Genomics MGG* **271**: 103–110.
- Kämper J, Kahmann R, Bölker M, Ma L-J, Brefort T, Saville BJ, Banuett F, Kronstad JW, Gold SE, Müller O, et al. 2006. Insights from the genome of the biotrophic fungal plant pathogen *Ustilago maydis*. *Nature* **444**: 97–101.
- Katoh K, Misawa K, Kuma K, Miyata T. 2002. MAFFT: a novel method for rapid multiple sequence alignment based on fast Fourier transform. *Nucleic Acids Res* **30**: 3059–3066.
- Khrunyk Y, Münch K, Schipper K, Lupas AN, Kahmann R. 2010. The use of FLP-mediated recombination for the functional analysis of an effector gene family in the biotrophic smut fungus *Ustilago maydis*. *New Phytol* **187**: 957–968.
- Kojic M, Holloman WK. 2012. Brh2 domain function distinguished by differential cellular responses to DNA damage and replication stress. *Mol Microbiol* **83**: 351–361.
- Kondrashov FA, Kondrashov AS. 2010. Measurements of spontaneous rates of mutations in the recent past and the near future. *Philos Trans R Soc Lond B Biol Sci* **365**: 1169–1176.
- Krombach S, Reissmann S, Kreibich S, Bochen F, Kahmann R. 2018. Virulence function of the *Ustilago maydis* sterol carrier protein 2. *New Phytol* **220**: 553–566.
- Lambowitz AM, Belfort M. 1993. Introns as mobile genetic elements. *Annu Rev Biochem* **62**: 587–622.
- Lanver D, Müller AN, Happel P, Schweizer G, Haas FB, Franitza M, Pellegrin C, Reissmann S, Altmüller J, Rensing SA, et al. 2018. The Biotrophic Development of *Ustilago maydis* Studied by RNA-Seq Analysis. *Plant Cell* **30**: 300–323.
- Laurie JD, Ali S, Linning R, Mannhaupt G, Wong P, Güldener U, Münsterkötter M, Moore R,

- Kahmann R, Bakkeren G, et al. 2012. Genome comparison of barley and maize smut fungi reveals targeted loss of RNA silencing components and species-specific presence of transposable elements. *Plant Cell* **24**: 1733–1745.
- Le SQ, Gascuel O. 2008. An improved general amino acid replacement matrix. *Mol Biol Evol* **25**: 1307–1320.
- Lloyd AH, Timmis JN. 2011. The origin and characterization of new nuclear genes originating from a cytoplasmic organellar genome. *Mol Biol Evol* **28**: 2019–2028.
- Louis EJ, Haber JE. 1991. Evolutionarily recent transfer of a group I mitochondrial intron to telomere regions in *Saccharomyces cerevisiae*. *Curr Genet* **20**: 411–415.
- Lynch M. 2007. *The Origins of Genome Architecture*. Sinauer Associates.
- Lynch M, Sung W, Morris K, Coffey N, Landry CR, Dopman EB, Dickinson WJ, Okamoto K, Kulkarni S, Hartl DL, et al. 2008. A genome-wide view of the spectrum of spontaneous mutations in yeast. *Proc Natl Acad Sci U S A* **105**: 9272–9277.
- Mewes HW, Ruepp A, Theis F, Rattei T, Walter M, Frishman D, Suhre K, Spannagl M, Mayer KFX, Stümpflen V, et al. 2011. MIPS: curated databases and comprehensive secondary data resources in 2010. *Nucleic Acids Res* **39**: D220–224.
- Möller M, Stukenbrock EH. 2017. Evolution and genome architecture in fungal plant pathogens. *Nat Rev Microbiol* **15**: 756–771.
- Ohta T. 2000. Evolution of gene families. *Gene* **259**: 45–52.
- Paradis E, Claude J, Strimmer K. 2004. APE: Analyses of Phylogenetics and Evolution in R language. *Bioinforma Oxf Engl* **20**: 289–290.
- Perrière G, Thioulouse J. 2002. Use and misuse of correspondence analysis in codon usage studies. *Nucleic Acids Res* **30**: 4548–4555.
- R Core Team. 2018. *R: A Language and Environment for Statistical Computing*. R Foundation for Statistical Computing <https://www.R-project.org/>.
- Ranwez V, Harispe S, Delsuc F, Douzery EJP. 2011. MACSE: Multiple Alignment of Coding SEquences accounting for frameshifts and stop codons. *PLoS One* **6**: e22594.
- Sánchez-Alonso P, Guzmán P. 1998. Organization of chromosome ends in *Ustilago maydis*. RecQ-like helicase motifs at telomeric regions. *Genetics* **148**: 1043–1054.
- Schirawski J, Mannhaupt G, Münch K, Brefort T, Schipper K, Doehlemann G, Di Stasio M, Rössel N, Mendoza-Mendoza A, Pester D, et al. 2010. Pathogenicity determinants in smut fungi revealed by genome comparison. *Science* **330**: 1546–1548.
- Schweizer G, Münch K, Mannhaupt G, Schirawski J, Kahmann R, Dutheil JY. 2018. Positively Selected Effector Genes and Their Contribution to Virulence in the Smut Fungus *Sporisorium reilianum*. *Genome Biol Evol* **10**: 629–645.
- Singh DK, Ghosh AK, Croteau DL, Bohr VA. 2012. RecQ helicases in DNA double strand break

repair and telomere maintenance. *Mutat Res* **736**: 15–24.

Steinberg G, Perez-Martin J. 2008. *Ustilago maydis*, a new fungal model system for cell biology. *Trends Cell Biol* **18**: 61–67.

Stoddard BL. 2005. Homing endonuclease structure and function. *Q Rev Biophys* **38**: 49–95.

Sun CW, Callis J. 1993. Recent stable insertion of mitochondrial DNA into an Arabidopsis polyubiquitin gene by nonhomologous recombination. *Plant Cell* **5**: 97–107.

Thorsness PE, Weber ER. 1996. Escape and migration of nucleic acids between chloroplasts, mitochondria, and the nucleus. *Int Rev Cytol* **165**: 207–234.

Valverde ME, Vandemark GJ, Martínez O, Paredes-López O. 2000. Genetic diversity of *Ustilago maydis* strains. *World J Microbiol Biotechnol* **16**: 49–55.

Volff J-N. 2006. Turning junk into gold: domestication of transposable elements and the creation of new genes in eukaryotes. *BioEssays News Rev Mol Cell Dev Biol* **28**: 913–922.

Vollmeister E, Schipper K, Baumann S, Haag C, Pohlmann T, Stock J, Feldbrügge M. 2012. Fungal development of the plant pathogen *Ustilago maydis*. *FEMS Microbiol Rev* **36**: 59–77.

413 **Tables**

414 **Table 1:** *UMAG\_11065* paralogs in *U. maydis*, together with a homolog from *F.*  
 415 *oxysporum* for comparison.

| Gene       | Chr / Scaffold / Contig | Start   | End     | Length of Chr / Scaffold / Contig | Number of introns | Length of protein | Relative position (1) |
|------------|-------------------------|---------|---------|-----------------------------------|-------------------|-------------------|-----------------------|
| UMAG_06476 | Chromosome 3            | 1641500 | 1642057 | 1642070                           | 0                 | 185               | 99.98%                |
| UMAG_06474 | Chromosome 3            | 1639598 | 1640203 | 1642070                           | 0                 | 201               | 99.87%                |
| UMAG_06506 | Chromosome 7            | 951043  | 954234  | 957188                            | 5                 | 983               | 99.52%                |
| UMAG_10585 | Chromosome 4            | 883585  | 884046  | 884984                            | 0                 | 153               | 99.87%                |
| UMAG_11065 | Chromosome 9            | 1886    | 1263    | 733962                            | 0                 | 207               | 0.21%                 |
| UMAG_03394 | Chromosome 9            | 8836    | 5960    | 733962                            | 0                 | 958               | 1.01%                 |
| UMAG_03869 | Chromosome 10           | 687301  | 690648  | 692354                            | 7                 | 937               | 99.51%                |
| UMAG_04094 | Chromosome 11           | 688670  | 689965  | 690620                            | 0                 | 431               | 99.81%                |
| UMAG_04486 | Chromosome 14           | 605233  | 609089  | 611467                            | 2                 | 1175              | 99.30%                |
| UMAG_04308 | Chromosome 14           | 1241    | 87      | 611467                            | 0                 | 384               | 0.11%                 |
| UMAG_05977 | Chromosome 20           | 523510  | 523884  | 523884                            | 0                 | 124               | 99.96% (2)            |
| UMAG_10980 | Chromosome 22           | 398220  | 400499  | 403590                            | 0                 | 759               | 98.95%                |
| UMAG_12076 | Contig 1.265            | 4214    | 5343    | 5343                              | 0                 | 376               | 89.43%                |
| FOXG_04692 | Supercontig 2.5         | 9736    | 6398    | 2688632                           | 0                 | 1112              | 0.30%                 |

416 (1) Position reported to the length of the chromosome or contig.

417 (2) N-terminal fragment only.

418

419 **Table 2:** Detection of the *UMAG\_11064*, and *UMAG\_11072* genes in several *U. maydis*  
 420 and *S. reilianum* strains.

| Region                | Strain           |      |      |        |      |      |      |      |      |                     |      |      |
|-----------------------|------------------|------|------|--------|------|------|------|------|------|---------------------|------|------|
|                       | <i>U. maydis</i> |      |      |        |      |      |      |      |      | <i>S. reilianum</i> |      |      |
|                       | SG200            | 10-1 | 518  | 521 I2 | O2   | P2   | S5   | T6   |      | JS161               | SRZ1 | SRZ2 |
| <i>UMAG_11064</i> ORF | +                | -    | +    | +      | -    | -    | -    | -    | -    | +                   | +    | +    |
| <i>UMAG_11072</i> ORF | +                | +    | +    | +      | +    | +    | +    | +    | +    |                     |      |      |
| <i>Cox1</i> Exon 1+2  | 254              | 254  | 254  | 254    | 254  | 254  | 254  | 254  | 254  | 1607                | 1607 | 1607 |
| <i>Cox1</i> Exon 7    | 1306             | 1306 | 1306 | 1306   | 1306 | 1306 | 1306 | 1306 | 1306 | 161                 | 161  | 161  |

421 Plus and minus signs indicate whether the corresponding gene could be amplified or not.

422 Numbers indicate the size of the amplified region in base pairs.

423

424 **Supplementary Table S1:** Homology search results using *UMAG\_11064* as a query on



425 the NCBI non-redundant nucleotide database, using BlastN. All hits with an E-value lower than 1E-  
426 04 are included, alongside with corresponding alignment length and percentage of sequence  
427 identity.

428

429 **Supplementary Table S2:** Homology search results using *UMAG\_11064* as a query on  
430 NCBI non-redundant protein database, using BlastP. All hits with an E-value lower than 1E-04 are  
431 included, alongside with corresponding alignment length and percentage of sequence identity.

432

433 **Supplementary Table S3:** Homology search results using *UMAG\_11065* as a query on  
434 NCBI non-redundant protein database, using BlastP. All hits with an E-value lower than 1E-04 are  
435 included, alongside with corresponding alignment length and percentage of sequence identity.

436

437 **Supplementary Table S4:** Homology search results using *U. maydis cox1* intron 6 as a  
438 query on a NCBI non-redundant protein database, using BlastX. All hits with an E-value lower than  
439 1E-04 are included, alongside with corresponding alignment length and percentage of sequence  
440 identity.

441

442 **Supplementary Table S5:** Homology search results using *S. reilianum cox1* intron 1 as a  
443 query on a NCBI non-redundant protein database, using BlastX. All hits with an E-value lower than  
444 1E-04 are included, alongside with corresponding alignment length and percentage of sequence  
445 identity.

446

447 **Supplementary Table S6:** Homology search results using *S. reilianum cox1* intron 2 as a  
448 query on a NCBI non-redundant protein database, using BlastX. All hits with an E-value lower than  
449 1E-04 are included, alongside with corresponding alignment length and percentage of sequence



450 identity.

451

452 **Supplementary Table S7: Primers used in this study.**

453 **Figures**

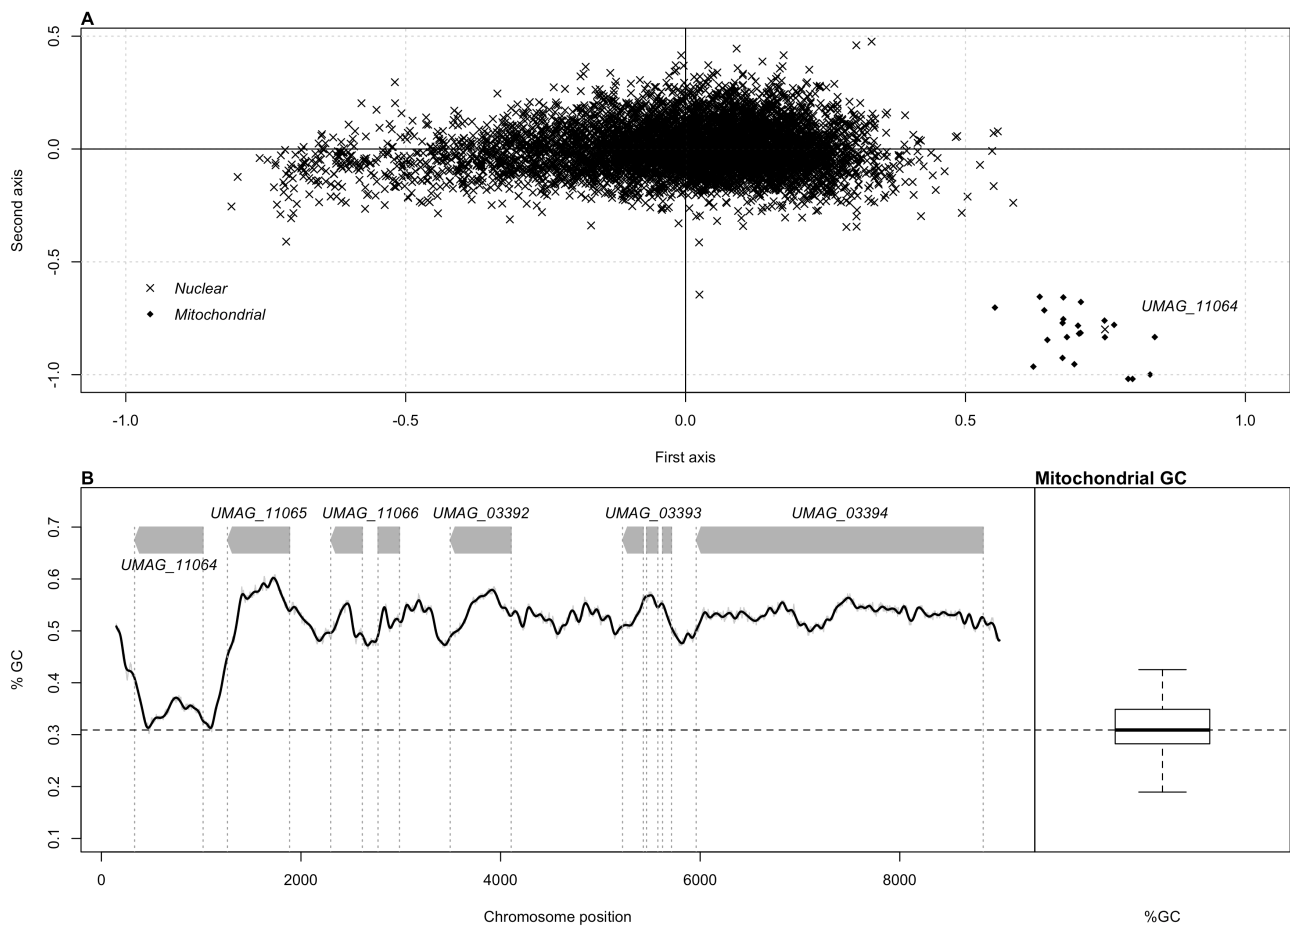

455 **Figure 1:** Identification of the *UMAG\_11064* gene. A) Codon usage analysis in *U.*  
456 *maydis*. B) Genomic context of the gene *UMAG\_11064*. GC content in 300 bp windows sliding by 1  
457 bp, and distribution of GC content in 300 bp windows of mitochondrial genome of *U. maydis*. The  
458 dash line represents the median of the distribution.  
459  
460

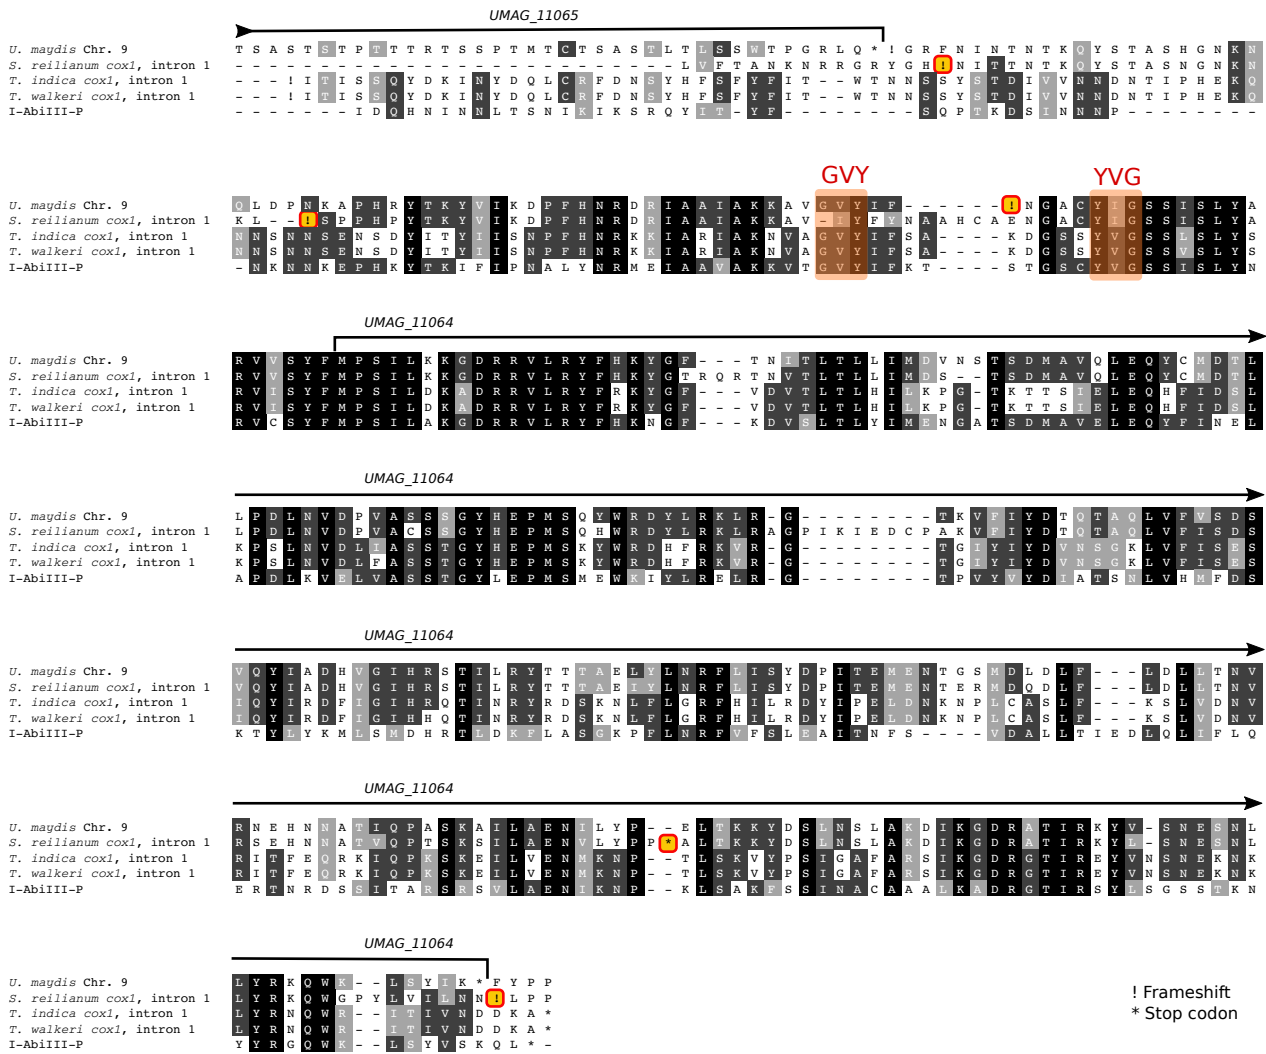

461 **Figure 2:** Alignment of *UMAG\_11064* and its upstream sequence with intron 1 from the  
 462 *cox1* gene of *S. reilianum*, *T. indica* and *T. walkeri*, as well as the coding sequence of the *A.*  
 463 *bisporus* HE. Shading indicates the level of amino-acid conservation. Amino-acids noted as 'X' have  
 464 incomplete codons due to frameshifts. Highlighted exclamation marks denote inferred frameshifts  
 465 and '\*' characters stop codons. The location of the active site of the HE (GVY-YVG) is highlighted.  
 466  
 467

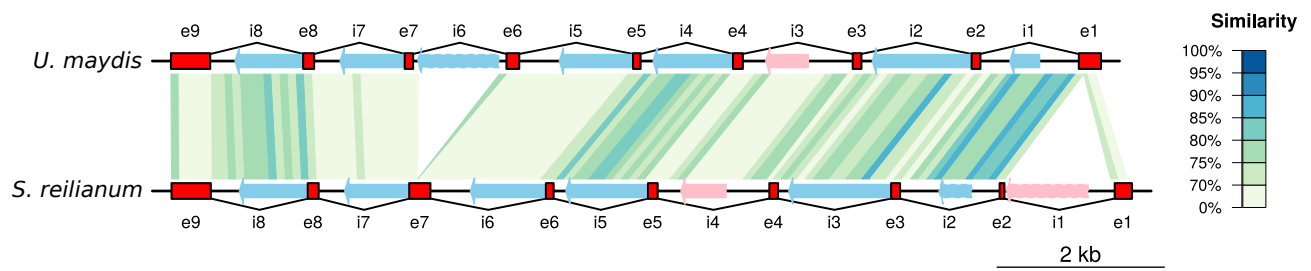

468 **Figure 3:** Intron structure of the *cox1* gene in *U. maydis* and *S. reilianum*. Annotated HEs  
469 are indicated. Red boxes depict *cox1* exons, numbered from *e1* to *e9*. Introns are represented by  
470 connecting lines and numbered *i1* to *i8*. Arrows within introns show LAGLIDADG (light blue) and  
471 GIY-YIG HEs (pink). Dashed arrows correspond to HEGs inferred by blast search, while solid  
472 arrows correspond to the annotation from the GenBank files. Piecewise sequence similarity between  
473 *U. maydis* and *S. reilianum* is displayed with a color gradient.

474

475

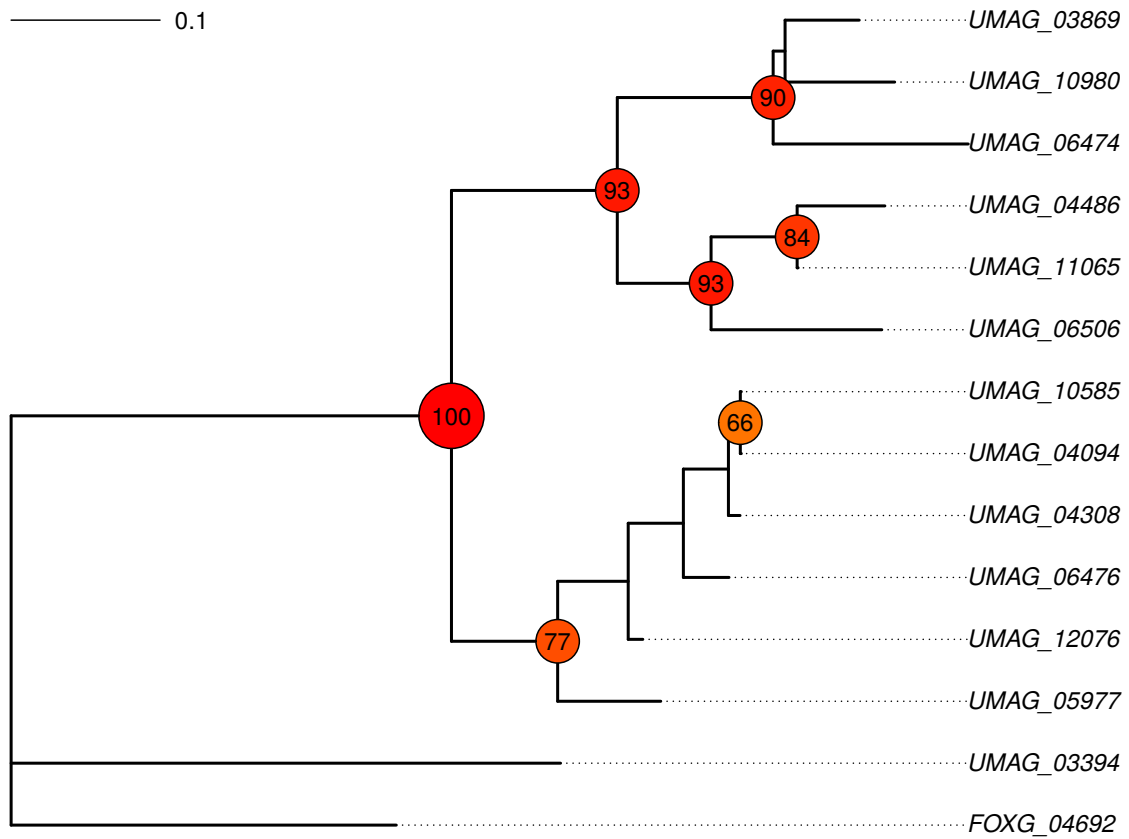

476 **Figure 4:** Maximum likelihood phylogeny of *UMAG\_11065* *U. maydis* paralogs together  
477 with the closest homolog from *F. oxysporum* (see Table 1). Support values higher than 0.6 are  
478 reported.

479

480

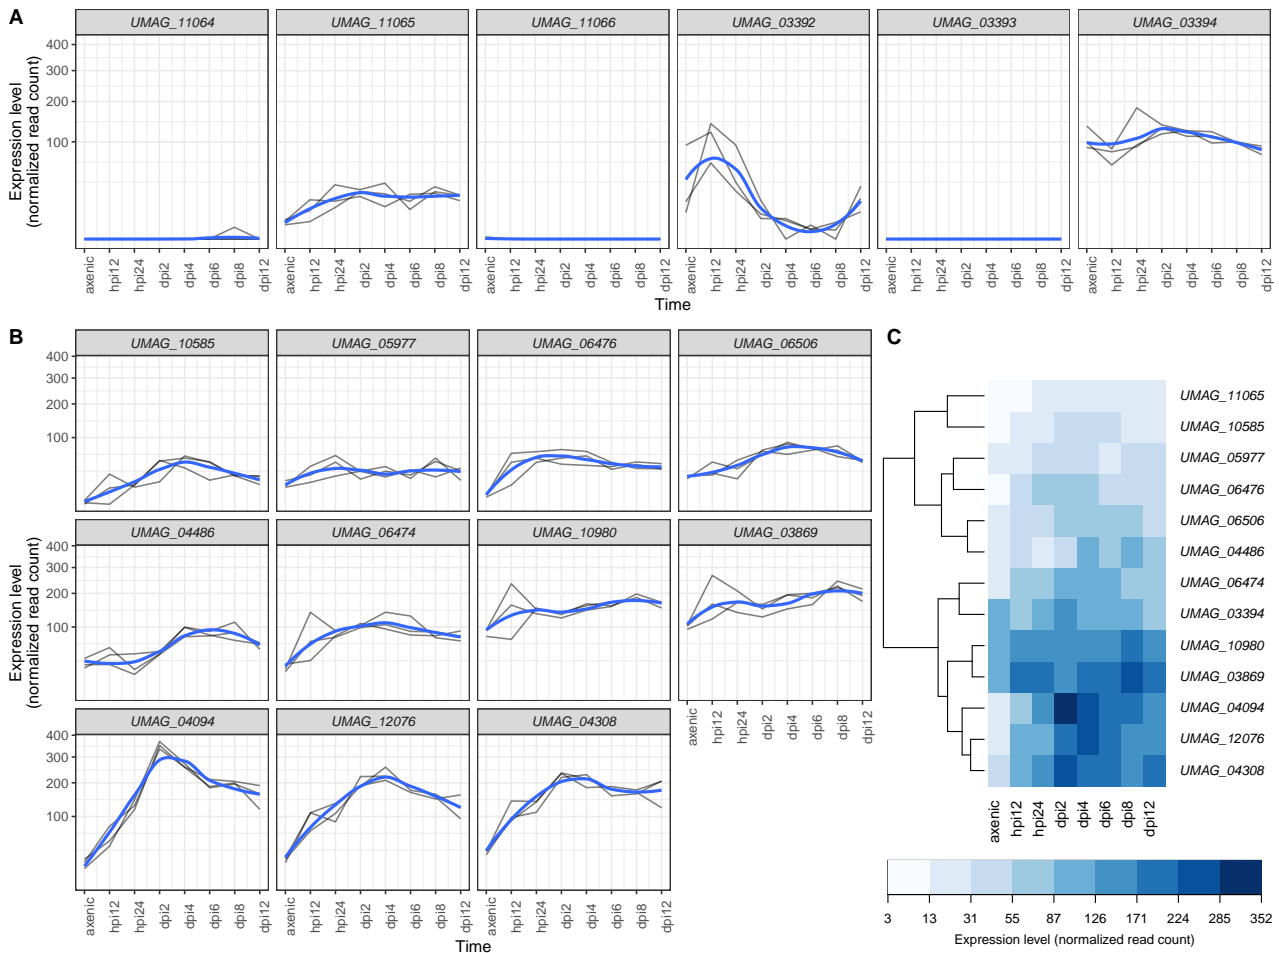

481 **Figure 5:** Patterns of gene expression for *UMG\_11064* and *UMG\_11065*, together  
 482 with neighboring and homologous genes. A) Gene expression profiles for genes in the chromosome  
 483 9 telomeric region (as depicted on Figure 1B). Straight lines represent three independent replicates,  
 484 while the blue curve depicts the smoothed conditional mean computed using the LOESS method. B)  
 485 Gene expression profiles for the *UMG\_11065* homologs (Figure 4). Legends as in A. C)  
 486 Clustering of the *UMG\_11065* homologs based on their averaged expression profile (see  
 487 Methods). Hpi: hours post-infection. Dpi: days post-infection.

488

489

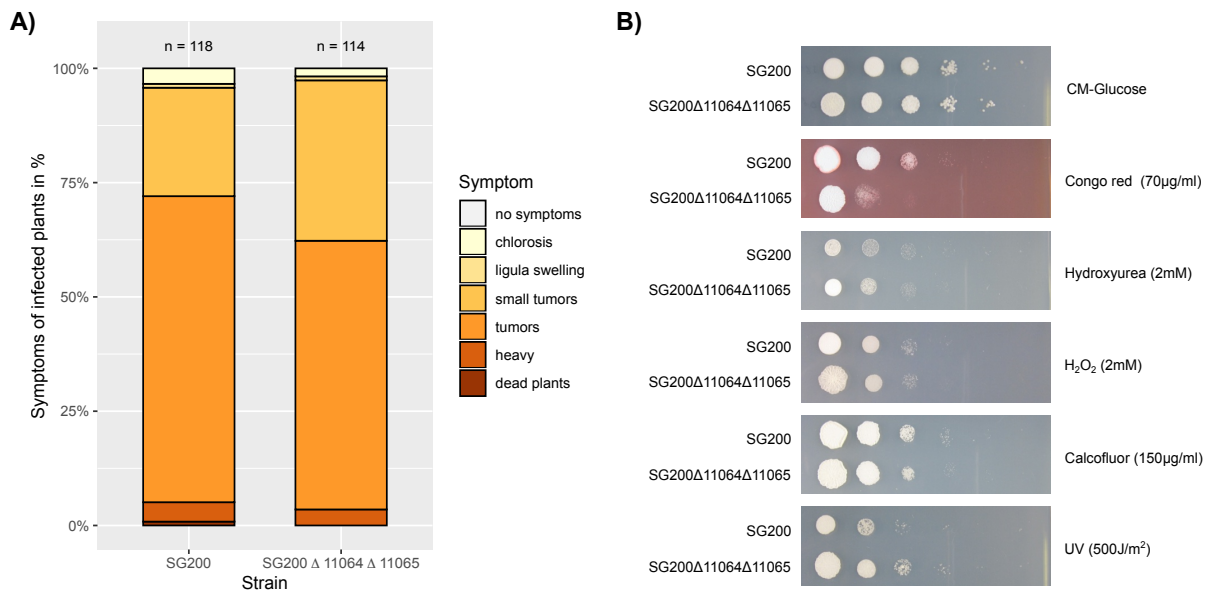

490 **Figure 6:** Phenotype assessment of the double deletion strain. A) The simultaneous  
491 deletion of *UMAG\_11064* and *UMAG\_11065* does not affect virulence. Maize seedlings were  
492 infected with the indicated strains. Disease symptoms were scored at 12 dpi according to Kämper et  
493 al. (Kämper et al. 2006) using the color code depicted on the right. Colors reflect the degree of  
494 severity, from brown-red (severe) to light yellow (mild). Data represent mean of n = 3 biologically  
495 independent experiments. Total numbers of infected plants are indicated above the respective  
496 columns. B) Stress assay of the double deletion strain ( $\Delta$ 11064 $\Delta$ 11065), lacking both genes  
497 *UMAG\_11064* and *UMAG\_11065*, compared to the parental SG200 strain.

498

499

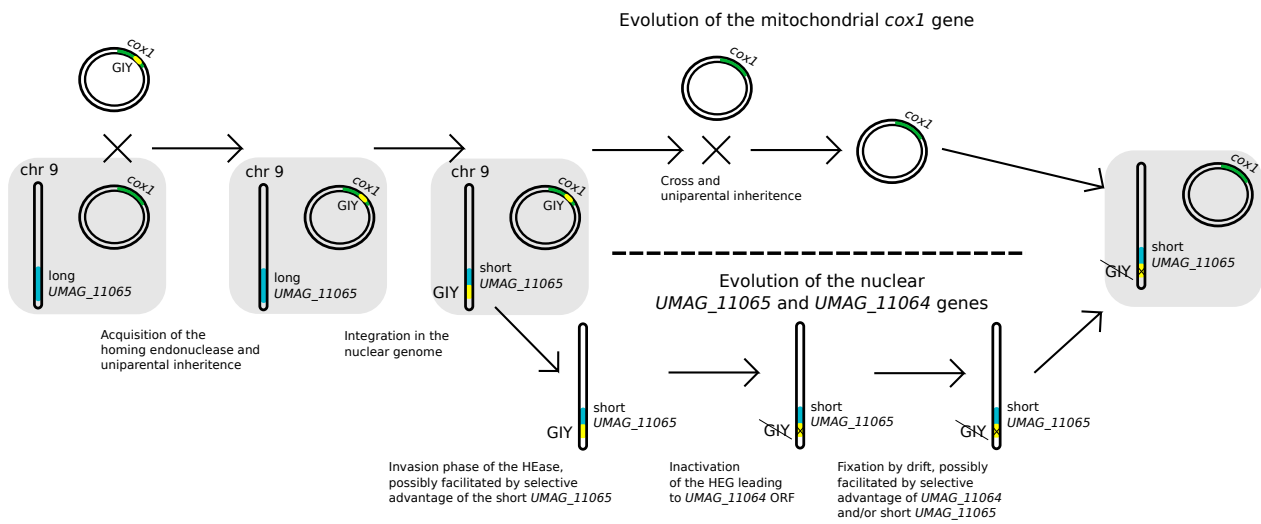

500 **Figure 7:** Possible evolutionary scenario recapitulating the events leading to the  
 501 formation of the *UMAG\_11064* and *UMAG\_11065* *U. maydis* genes.

502

503



504           **Supplementary Figure S1:** Amplification of the candidate region in the telomeric region  
505 of chromosome 9. A) Genomic context based on the *U. maydis* reference genome, and location PCR  
506 primers. B) PCR results with corresponding expected fragment sizes. Primer sequences are  
507 provided in Table S7.

508  
509           **Supplementary Figure S2:** Amplification of *UMAG\_11064*, *UMAG\_11072* and *cox1*  
510 exons 1 and 7 in several *U. maydis* and *S. reilianum* strains. Strains are as in Table 2. Primer  
511 sequences are provided in Table S7.

512  
513           **Supplementary Figure S3:** Verification of the deletion of *UMAG\_11064* and  
514 *UMAG\_11065*. A) Schematic map of the genomic region containing *UMAG\_11064* and  
515 *UMAG\_11065* in SG200 and SG200 $\Delta$ 11064 $\Delta$ 11065. Primers used to amplify the left and right  
516 border sequences are indicated. B) DNA of SG200 and SG200 $\Delta$ 11064 $\Delta$ 11065 was cleaved with  
517 *Fsp1* and subjected to southern blot analysis using a mixture of Probes 1 and 2 indicated in A). The  
518 2.94 kb fragment is diagnostic for SG200 while the 4.19 kb fragment is diagnostic for the deletion  
519 of *UMAG\_11064* and *UMAG\_11065*.

520

521 **Supplementary file:**

522           **Supplementary File S1:** Scripts used to conduct the phylogenetic and statistical analyses,  
523 As well as R code used to generate figures 1, 3, 4, 5 and 6.
