# Supplementary material for: The insertion of a mitochondrial selfish element into the nuclear genome and its consequences
Source: bioRxiv or medRxiv preprint supplement (doi:10.1101/787044), 2020-05-16

A)

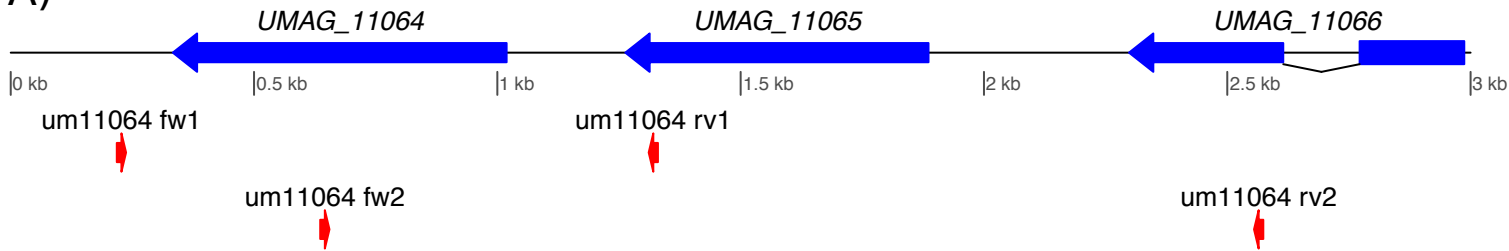

B)

fw1-rv1

fw1-rv2

fw2-rv2

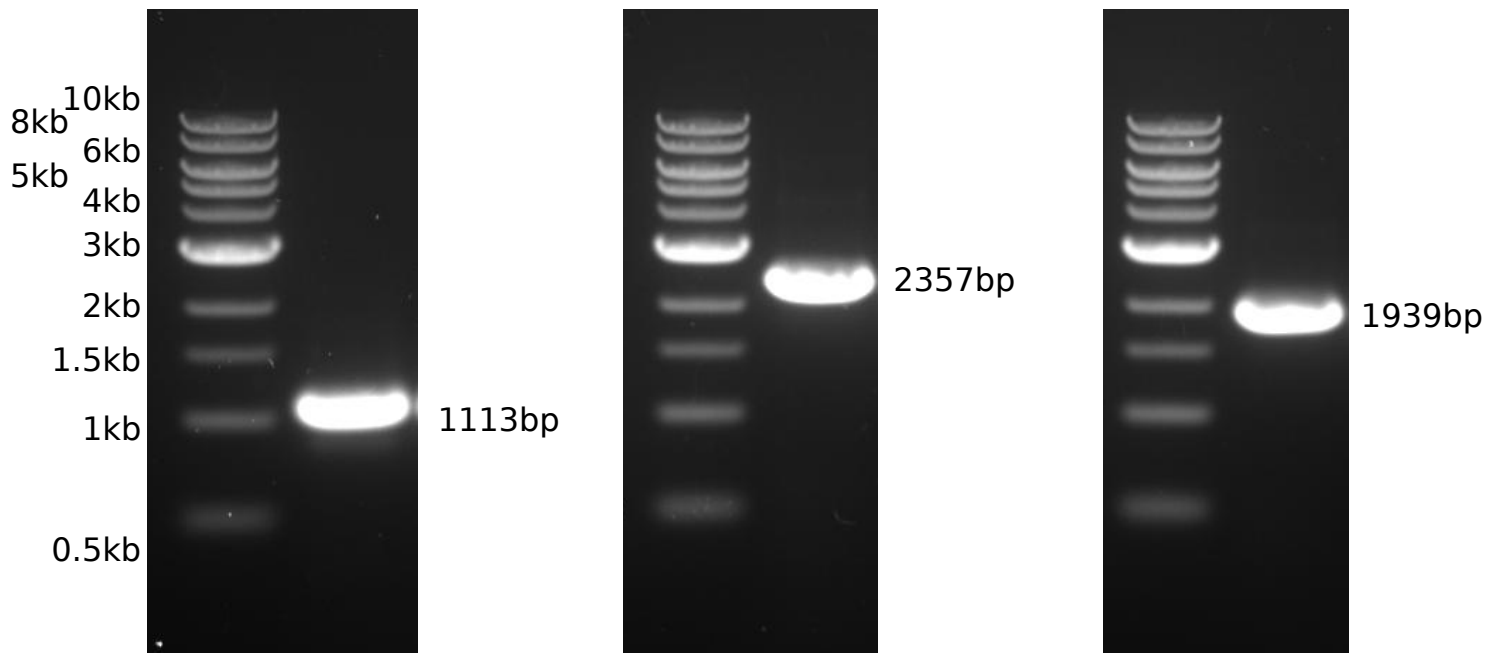

Supplement: Supplementary file [file media-1.pdf]
