# Supplementary material for: The insertion of a mitochondrial selfish element into the nuclear genome and its consequences
Source: bioRxiv or medRxiv preprint supplement (doi:10.1101/787044), 2020-05-16
Supplement: Supplementary file [file media-2.pdf]

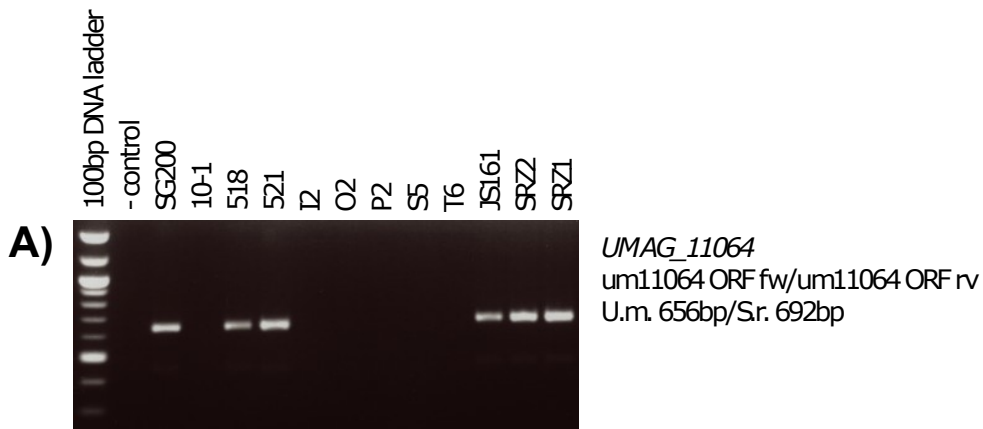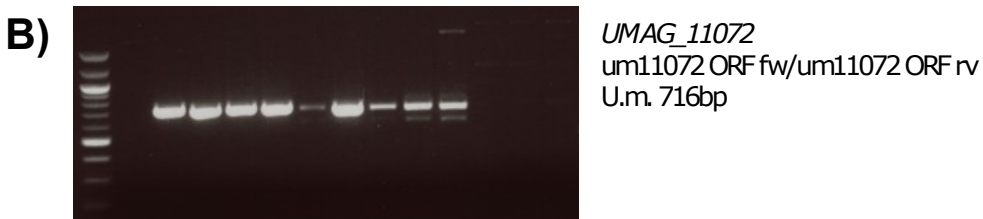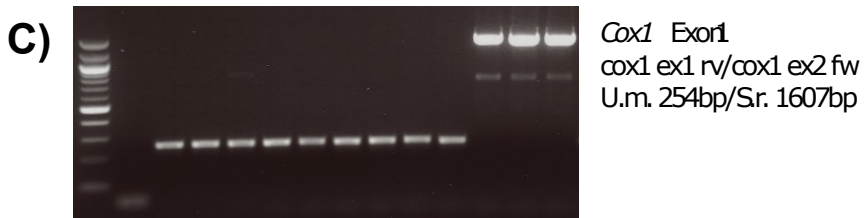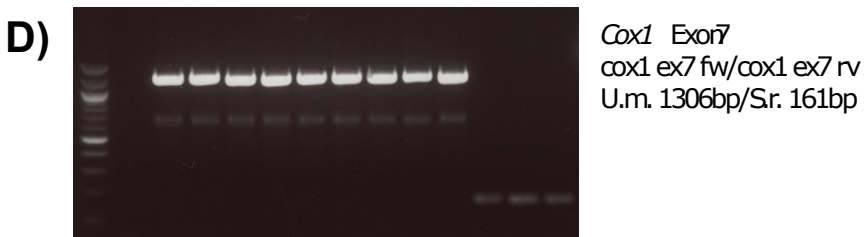

**E)**

| Region                | Strain           |      |      |      |      |      |      |      |      |                     |      |      |
|-----------------------|------------------|------|------|------|------|------|------|------|------|---------------------|------|------|
|                       | <i>U. maydis</i> |      |      |      |      |      |      |      |      | <i>S. reilianum</i> |      |      |
|                       | SG200            | 10-1 | 518  | 521  | I2   | O2   | P2   | S5   | T6   | JS161               | SRZ1 | SRZ2 |
| <i>UMAG_11064</i> ORF | +                | -    | +    | +    | -    | -    | -    | -    | -    | +                   | +    | +    |
| <i>UMAG_11072</i> ORF | +                | +    | +    | +    | +    | +    | +    | +    | +    | (not tested)        |      |      |
| <i>Cox1</i> Exon 1+2  |                  | 254  | 254  | 254  | 254  | 254  | 254  | 254  | 254  | 1607                | 1607 | 1607 |
| <i>Cox1</i> Exon 7    |                  | 1306 | 1306 | 1306 | 1306 | 1306 | 1306 | 1306 | 1306 | 161                 | 161  | 161  |
