# Supplementary material for: The insertion of a mitochondrial selfish element into the nuclear genome and its consequences
Source: bioRxiv or medRxiv preprint supplement (doi:10.1101/787044), 2020-05-16

**A)**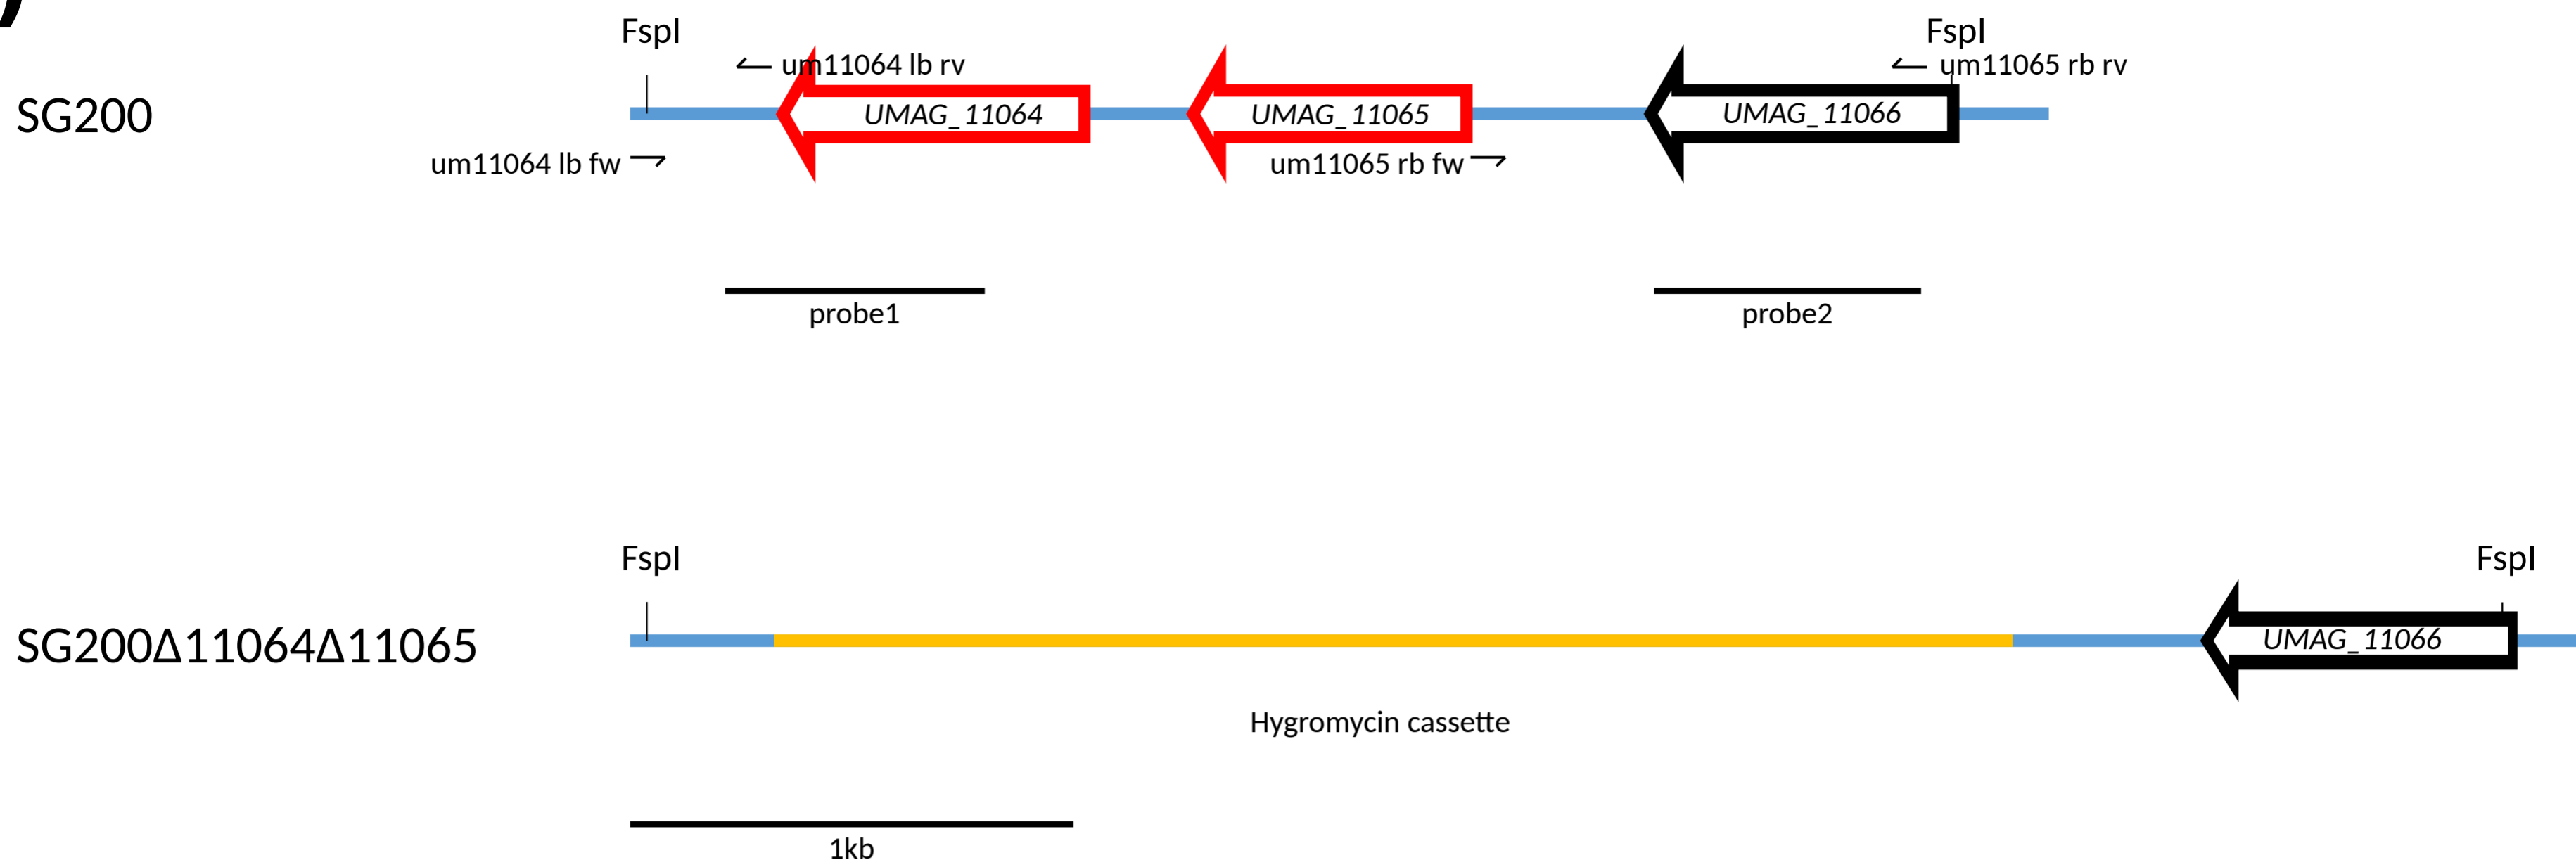**B)**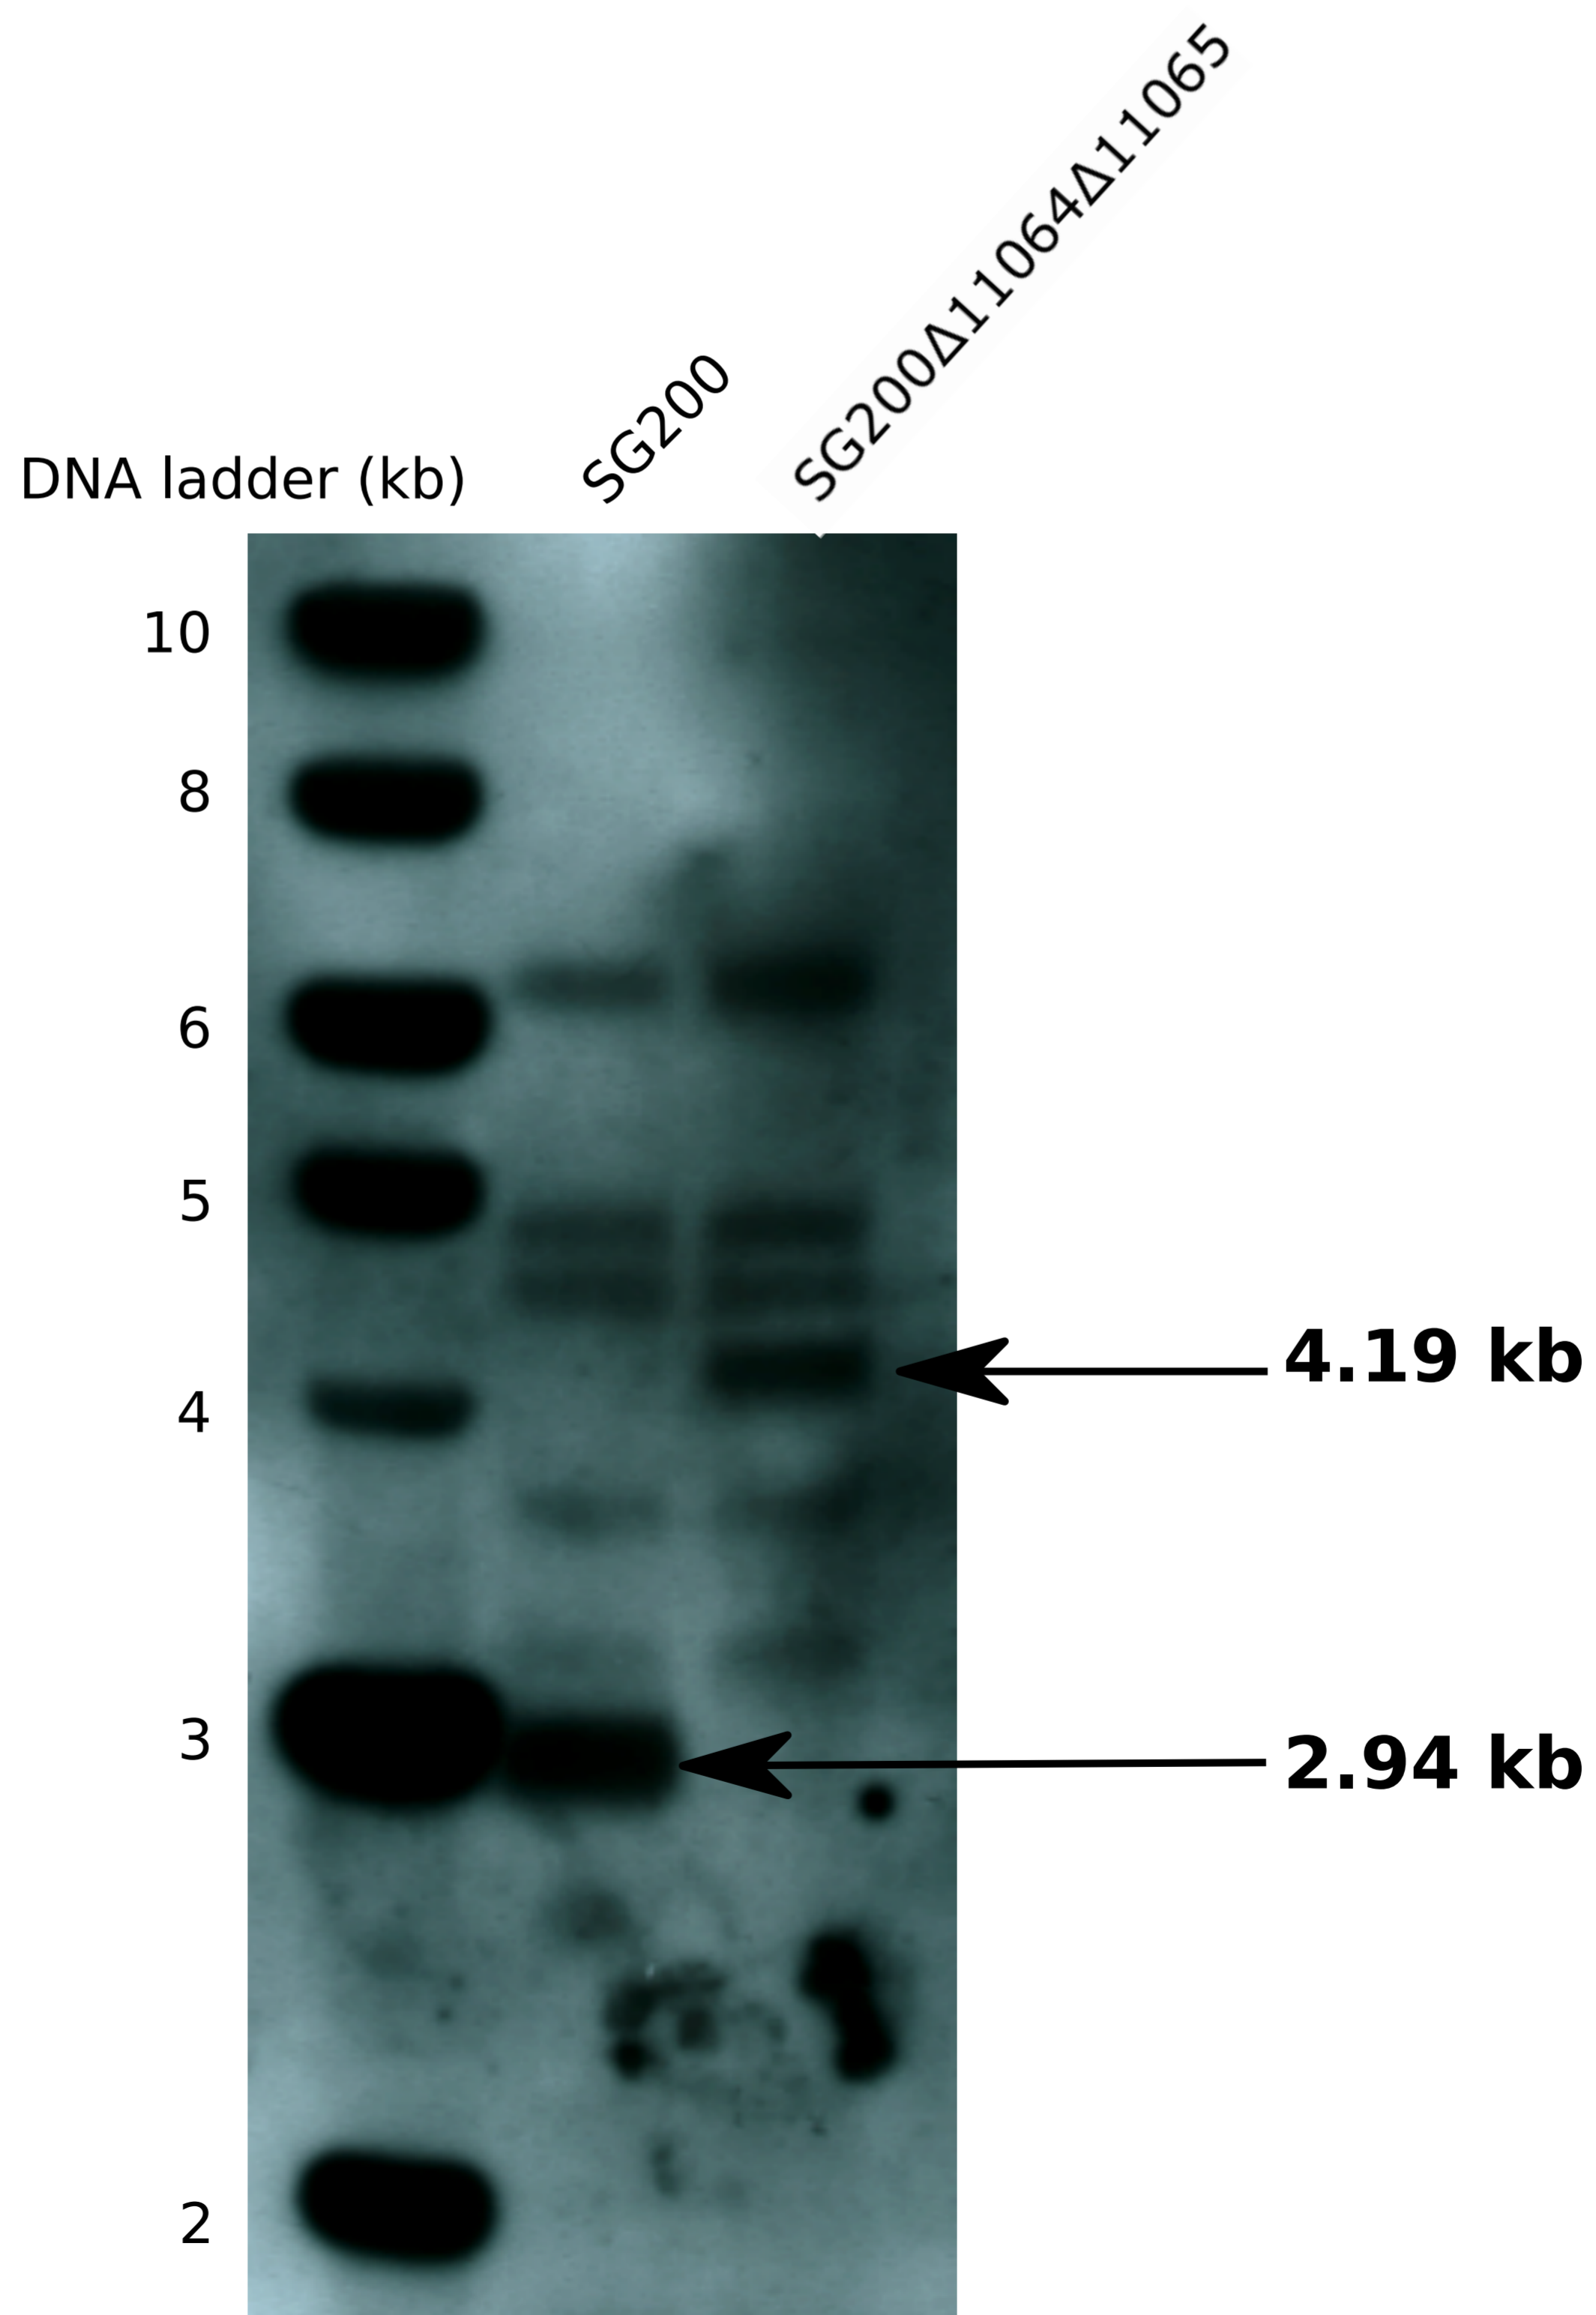

Supplement: Supplementary file [file media-3.pdf]
